# Supplementary material for: Towards designing environmentally safe ionic liquids: the influence of the cation structure
Source: Royal Society of Chemistry journal article supplement (doi:10.1039/c4gc00526k), 2014-01-01
Supplement: c4gc00526k2.xlsx [file c4gc00526k2.xlsx]

## Sheet: Supplementary material 2
Towards designing environmentally safe ionic liquids: Influence of cation structure
Supplementary material 2
Anita Sosnowska1, Maciej Barycki1, Monika Zaborowska1, Anna Rybinska1, and Tomasz Puzyn1*
1 Laboratory of Environmental Chemometrics, Institute for Environmental and Human Health Protection, Faculty of Chemistry, University of Gdańsk, Wita Stwosza 63, 80-308 Gdańsk Poland
*Corresponding author: Prof. Tomasz Puzyn,
Laboratory of Environmental Chemometrics, Faculty of Chemistry, University of Gdańsk,
ul. Wita Stwosza 63, 80-308 Gdańsk, Poland.
Tel.: +48 58 523 52 48; E-mail address: t.puzyn@qsar.eu.org

## Sheet: SM T1
EC50 values for acetylcholinesterase inhibition test
No.	Symbol (given in this work)	CAS number (if available)	Molecular formlua	Name	Acetylcholi-nesterase	ref.
					log10 EC50 [μM]
1	001ka	143314-16-3	C6H11BF4N2	1-Ethyl-3-methylimidazolium Tetrafluoroborate	2.05	e
2	002ka	64697-40-1	C12H23ClN2	3-Methyl-1-octylimidazolium Chloride	1.5955	l
3	003ka	304680-36-2	C12H23F6N2P	3-Methyl-1-octylimidazolium Hexafluorophosphate	2.03	e
4	004ka	244193-52-0	C12H23BF4N2	3-Methyl-1-octylimidazolium Tetrafluoroborate	1.5302	l
5	005ka	171058-20-1	C13H25ClN2	3-Methyl-1-nonylimidazolium Chloride	1.36173	l
6	006ka	343952-29-4	C13H25F6N2P	3-Methyl-1-nonylimidazolium Hexafluorophosphate	1.617	l
7	007ka	244193-55-3	C13H25BF4N2	3-Methyl-1-nonylimidazolium Tetrafluoroborate	1.43	e
8	008ka	244193-48-4	C7H13BF4N2	3-Methyl-1-propylimidazolium Tetrafluoroborate	2.29447	l
9	009ka	174501-65-6	C8H15BF4N2	1-butyl-3-methylimidazolium tetrafluoroborate	1.98	h
10	010ka	85100-77-2	C8H15BrN2	1-Butyl-3-methylimidazolium Bromide	1.95904	l
11	011ka	581101-91-9	C9H17BF4N2	1-Butyl-3-ethylimidazolium Tetrafluoroborate	2.04532	l
12	015ka	171058-17-6	C10H19ClN2	1-hexyl-3-methylimidazolium chloride	1.92	e
13	016ka	244193-50-8	C10H19BF4N2	1-Hexyl-3-methylimidazolium Tetrafluoroborate	1.87679	l
14	017ka	547719-00-6	C11H21BrN2	1-Hexyl-3-ethylimidazolium Bromide	1.77	e
15	018ka	393550-29-3	C11H21BF4N2	1-Hexyl-3-ethylimidazolium Tetrafluoroborate	1.84	e
16	019ka	581101-92-0	C11H21ClN2	1-heptyl-3-methylimidazolium chloride	2.07	e
17	020ka	357915-04-9	C11H21F6N2P	1-heptyl-3-methylimidazolium hexafluorophosphate	1.91	e
18	021ka	244193-51-9	C11H21BF4N2	1-heptyl-3-methylimidazolium Tetrafluoroborate	2.12	e
19	022ka	171058-18-7	C14H27ClN2	1-decyl-3-methylimidazolium chloride	1.09	e
20	023ka	362043-46-7	C14H27F6N2P	1-decyl-3-methylimidazolium hexafluorophosphate	1.68395	l
21	024ka	244193-56-4	C14H27BF4N2	1-Decyl-3-methylimidazolium Tetrafluoroborate	1.08279	l
22	025ka	581101-93-1	C15H29BrN2	1-Decyl-3-ethylimidazolium Bromide	0.92	e
23	029ka	174899-83-3	C10H15F6N3O4S2	1-butyl-3-methylimidazolium bis(trifluoromethylsulfonyl)imide	1.96379	l
24	031ka			3-(2-hydroxyethyl)-1-methylimidazolium bis(trifluoromethylsulfonyl)imide	2.88	e
25	035ka	500996-04-3	C11H13BF4N2	1-benzyl-3-methylimidazolium tetrafluoroborate	1.98227	l
26	038ka	342573-75-5	C8H16N2O4S	1-Ethyl-3-methylimidazolium Ethyl Sulfate	2.06819	l
27	039ka	79917-90-1	C8H15ClN2	1-Butyl-3-methylimidazolium Chloride	1.91487	l
28	040ka	304680-35-1	C10H19F6N2P	1-hexyl-3-methylimidazolium Hexafluorophosphate	1.87622	l
29	041ka	174501-64-5	C8H15F6N2P	1-Butyl-3-methylimidazolium Hexafluorophosphate	2.14922	l
30	047ka			1-(2-Methoxypropyl)-3-methylimidazolium Bis(trifluoromethylsulfonyl)amide	2.58	e
31	048ka			1-(2-Methoxypropyl)-3-methylimidazolium Chloride	2.61	e
32	053ka	174899-96-8	C11H17F3N2O2	1-Butyl-3-ethylimidazolium Tetrafluoroborate	2.01284	l
33	054ka	145022-48-6	C10H17F3N2O3S	1-Butyl-3-ethylimidazolium Tetrafluoroborate	2.0086	l
34	055ka			1-Butyl-3-methylimidazolium Bis(trifluoromethyl)amide	1.6	e
35	057ka	174899-66-2	C9H15F3N2O3S	1-Butyl-3-methylimidazolium Trifluoromethanesulfonate	1.93044	l
36	058ka			1-Butyl-3-methylimidazolium Dicyanamide	1.93	e
37	060ka	595565-54-1	C13H26N2O6S	1-Butyl-3-methylimidazolium 2-(2-Methoxyethoxy)ethyl sulfate	1.98856	l
38	061ka	401788-98-5	C9H18N2O4S	1-Butyl-3-methylimidazolium 1-Methylsulfate	1.95376	l
39	062ka	445473-58-5	C16H32N2O4S	1-Butyl-3-methylimidazolium 1-Octylsulfate	1.97864	l
40	063ka	262297-13-2	C8H16N2O4S	1-Butyl-3-methylimidazolium Hydrogensulfate	1.97174	l
41	064ka			1-Butyl-3-methylimidazolium Toluene-4-sulfonate	2	e
42	065ka	344790-87-0	C9H15N3S	1-Butyl-3-methylimidazolium Thiocyanate	1.99651	l
43	066ka	342789-81-5	C9H18N2O3S	1-Butyl-3-methylimidazolium 1-Methanesulfonate	1.98811	l
44	067ka	65039-05-6	C8H15IN2	1-Butyl-3-methylimidazolium Iodide	2.01703	l
45	068ka	376650-04-3	C18H19BN2O4	1-Ethyl-3-methylimidazolium Bis[1,2-benzenediolato(2-)-O1,O2]borate	2.09342	l
46	069ka	852616-00-3	C10H11F10N2O2P	1-ethyl-3-methylimidazolium bis(pentafluoroethyl)phosphinate	2.08991	l
47	070ka			1-Ethyl-3-methylimidazolium Bis[oxalato(2-)]-borate	2	e
48	071ka	742099-80-5	C10H11BN6	1-Ethyl-3-methylimidazolium Tetracyanoborate	1.98	e
49	072ka	155371-19-0	C6H11F6N2P	1-ethyl-3-methylimidazolium hexafluorophosphate	2.04922	l
50	073ka	174899-65-1	C8H11F3N2O2	1-ethyl-3-methylimidazolium trifluoroacetate	2.02531	l
51	074ka			1-Ethyl-3-methylimidazolium Toluene-4-sulfonate	2.22	e
52	075ka	412009-61-1	C6H12N2O4S	1-ethyl-3-methylimidazolium hydrogen sulfate	2.13	e
53	076ka	145022-44-2	C7H11F3N2O3S	1-ethyl-3-methylimidazolium trifluoromethanesulfonate	2.13033	l
54	078ka	61546-01-8	C20H39ClN2	1-hexadecyl-3-methylimidazolium chloride	0.682145	l
55	079ka			1-Hexyl-3-methylimidazolium 1,2-Benzisothiazolonium 1,1-dioxide	1.96	e
56	081ka	433337-12-3	C12H15F6N2P	1-Methyl-3-(2-phenylethyl)imidazolium Hexafluorophosphate	1.89653	l
57	082ka			1-Methyl-3-[(4-methylphenyl)methyl]imidazolium Chloride	1.86	e
58	083ka			1-Methyl-3-[(4-methylphenyl)methyl]imidazolium Tetrafluoroborate	2.08	e
59	084ka			3-Hexyl-1,2-dimethylimidazolium Tetrafluoroborate	1.27	e
60	085ka	171058-19-8	C22H43ClN2	3-Methyl-1-octadecylimidazolium Chloride	0.96426	l
61	086ka			3-Methyl-1-octylimidazolium Bis(trifluoromethylsulfonyl)amide	2.03	e
62	087ka	171058-21-2	C18H35ClN2	3-Methyl-1-tetradecylimidazolium Chloride	0.54	e
63	088ka	174899-82-2	C8H11F6N3O4S2	1-ethyl-3-methylimidazolium bis(trifluoromethylsulfonyl)amide	2.03	h
64	090ka	65039-10-3	C7H11ClN2	1-methyl-3-(2-propenyl)imidazolium chloride	2.29885	l
65	097ka	382150-50-7	C12H19F6N3O4S2	1-hexyl-3-methylimidazolium bis(trifluoromethylsulfonyl)amide	2.15229	l
66	099ka	917762-91-5	C14H15F18N2P	1-butyl-3-methylimidazolium trifluoridotris(pentafluoroethyl)phosphate	2.4	h
67	100ka	713512-19-7	C16H19F18N2P	1-hexyl-3-methylimidazolium trifluoridotris(pentafluoroethyl)phosphate	3	l
68	101ka	943229-71-8	C19H19F24N2P	1-hexyl-3-methylimidazolium trifluoridotris(heptafluoropropyl)phosphate	2.39794	l
69	105ka	1012794-00-1	C6H11INO2	1-(2-hydroxyethyl)-3-methylimidazolium iodide	2.96047	l
70	106ka	355011-34-6	C7H13ClN2O	1-(3-hydroxypropyl)-3-methylimidazolium chloride	2.98543	l
71	107ka	945996-02-1	C7H13ClN2O	1-(ethoxymethyl)-3-methylimidazolium chloride	2.60959	l
72	108ka	1012793-99-5	C8H15BrN2O	1-(2-ethoxyethyl)-3-methylimidazolium bromide	2.27184	l
73	109ka	474972-46-8	C7H13ClN2O	1-(2-methoxyethyl)-3-methylimidazolium chloride	2.57864	l
74	110ka	1012794-06-7	C8H15ClN2O	1-(3-methoxypropyl)-3-methylimidazolium chloride	2.60746	l
75	112ka	937720-90-6	C8H8F6N4O4S2	1-(cyanomethyl)-3-methylimidazolium bis(trifluoromethylsulfonyl)amide	2.87622	l
76	113ka	827027-30-5	C9H13F6N3O5S2	1-(3-hydroxypropyl)-3-methylimidazolium bis(trifluoromethylsulfonyl)amide	2.73957	l
77	114ka	945996-13-4	C9H13F6N3O5S2	1-(ethoxymethyl)-3-methylimidazolium bis(trifluoromethylsulfonyl)amide	2.44716	l
78	115ka	178631-01-1	C9H13F6N3O5S2	1-(2-methoxyethyl)-3-methylimidazolium bis(trifluoromethylsulfonyl)amide	2.47276	l
79	116ka	778593-17-2	C10H15F6N3O5S2	1-(2-ethoxyethyl)-3-methylimidazolium bis(trifluoromethylsulfonyl)amide	2.12057	l
80	117ka	1015254-36-0	C10H15F6N3O5S2	1-(3-methoxypropyl)-3-methylimidazolium bis(trifluoromethylsulfonyl)amide	2.58206	l
81	119ka	65039-09-0	C6H11ClN2	1-ethyl-3-methylimidazolium chloride	2.06	h
82	121ka	845835-00-9	C12H15BF4N2	1-methyl-3-(2-phenylethyl)imidazolium tetrafluoroborate	1.97128	l
83	123ka	79917-89-8	C7H13ClN2	1-methyl-3-propylimidazolium chloride	2.26717	l
84	125ka	805228-35-7	C8H13N2O2.Cl	1-(3-carboxypropyl)-3-methylimidazolium chloride	3	l
85	126ka	952429-64-0	C12H21BrN2O2	1-(7-carboxyheptyl)-3-methylimidazolium bromide	3	l
86	128ka	864665-30-5	C8H15ClN2O	1-(4-hydroxybutyl)-3-methylimidazolium chloride	2.7007	l
87	130ka	637348-59-5	C8H15BrN2	1-ethyl-3-propylimidazolium bromide	2.21	h
88	131ka			1-methylimidazolium tetrafluoroborate	3	h
89	132ka	216300-12-8	C7H13F6N2P	1-methyl-3-propylimidazolium hexafluorophosphate	2.22531	l
90	185ka	187332-85-0	C12H15ClN2	1-methyl-3-(2-phenylethyl)imidazolium chloride	1.91116	l
91	186ka	952429-67-3	C8H13BrN2O	1-methyl-3-(3-oxobutyl)imidazolium bromide	2.79099	l
92	187ka	952429-65-1	C12H23BrN2O	1-(8-hydroxyoctyl)-3-methylimidazolium bromide	1.27875	l
93	191ka	410522-18-8	C15H22N2O3S	1-butyl-3-methylimidazolium 4-methylbenzenesulfonate	1.99564	l
94	192ka	433337-11-2	C11H13F6N2P	1-benzyl-3-methylimidazolium hexafluorophosphate	1.73957	l
95	193ka	36443-80-8	C11H13ClN2	1-benzyl-3-methylimidazolium chloride	2.04532	l
96	195ka	817575-02-3	C20H40N2O4S	1-methyl-3-octylimidazolium O-octyl sulfate	1.3784	l
97	196ka	790663-77-3	C11H22N2O6S	1-ethyl-3-methylimidazolium O-2-(2-methoxyethoxy)ethyl sulfate	2.07918	l
98	200ka	1196206-01-5	C14H19F9N2O6S3	1-hexyl-3-methylimidazolium tris(trifluoromethylsulfonyl)methanide	2.39794	l
99	201ka	697248-62-7	C17H23N3O3S	1-hexyl-3-methylimidazolium 1,1-dioxo-1,2-dihydrobenzo[d]isothiazol-3-onate	1.95761	l
100	206ka	129073-65-0	C7H18ClNO	(Ethoxymethyl)ethyldimethylammonium Chloride	2.36	e
101	207ka		C9H18F6N2O5S2	(Ethoxymethyl)ethyldimethylammonium Bis(trifluoromethylsulfonyl)amide	2.3	e
102	208ka			Tetraethylammonium Bis[1,2-benzenediolato(2-)-O1,O2]borate	2.9	e
103	209ka	965-32-2	C19H34ClN	Benzyldecyldimethylammonium Chloride	0.73	e
104	210ka	258273-76-6	C10H20F6N2O4S2	Butylethyldimethylammonium Bis(trifluoromethylsulfonyl)amide	2.03	e
105	211ka	258273-75-5	C9H18F6N2O4S2	Butyltrimethylammonium Bis(trifluoromethylsulfonyl)amide	2.6	e
106	212ka	863031-17-8	C10H20F6N2O5S2	Ethyl(2-ethoxyethyl)dimethylammonium Bis(trifluoromethylsulfonyl)amide	2.55	e
107	213ka	854102-71-9	C8H16F6N2O5S2	Ethyl(2-hydroxyethyl)dimethylammonium Bis(trifluoromethylsulfonyl)amide	2.59	e
108	214ka	557788-37-1	C9H18F6N2O5S2	Ethyl(2-methoxyethyl)dimethylammonium Bis(trifluoromethylsulfonyl)amide	2.45	e
109	215ka		C10H20F6N2O5S2	Ethyl(3-methoxypropyl)dimethylammonium Bis(trifluoromethylsulfonyl)amide	2.92	e
110	216ka	1643-19-2	C16H36BrN	tetrabutylammonium bromide	2.3	e
111	217ka		C6H13ClN2	(cyanomethyl)ethyldimethylammonium chloride	3	h
112	218ka	625835-85-0	C8H20ClN	butylethyldimethylammonium chloride	2.06	h
113	219ka	625835-83-8	C7H18ClNO	ethyl(2-methoxyethyl)dimethylammonium chloride	2.57	h
114	221ka		C8H20ClNO	ethyl(3-methoxypropyl)dimethylammonium chloride	2.97	h
115	222ka	873056-83-8	C8H13F6N3O4S2	(cyanomethyl)ethyldimethylammonium bis(trifluoromethylsulfonyl)amide	3	h
116	223ka	849502-24-5	C9H18F6N2O5S2	ethyl(3-hydroxypropyl)dimethylammonium bis(trifluoromethylsulfonyl)amide	3	h
117	224ka			bis(2-methoxyethyl)ammonium sulfamate	3	h
118	225ka	125677-68-1	C7H17NO4	(2-hydroxyethyl)trimethylammonium hydroxyacetate	3	h
119	226ka	53226-35-0	C3H9NO3	(2-hydroxyethyl)ammonium formate	3	h
120	227ka			ethyl(2-ethoxyethyl)dimethylammonium chloride	2.56	h
121	228ka		C6H16INO	ethyl(2-hydroxyethyl)dimethylammonium iodide	2.67	h
122	229ka	99150-55-7	C8H19NO4	(2-hydroxyethyl)trimethylammonium 2-hydroxypropanoate	3	h
123	230ka	258273-77-7	C9H18F6N2O4S2	ethyldimethylpropylammonium bis(trifluoromethylsulfonyl)amide	2.34	h
124	231ka	59101-30-3	C5H13NO3	(2-hydroxyethyl)dimethylammonium formate	3	h
125	232ka	123-41-1	C5H15NO2	(2-hydroxyethyl)trimethylammonium hydroxide	3	h
126	239ka	58937-21-6	C6H15NO3	(2-hydroxyethyl)dimethylammonium acetate	3	h
127	240ka	176158-74-0	C6H15NO4	(2-hydroxyethyl)dimethylammonium hydroxyacetate	3	h
128	241ka	56-34-8	C8H20ClN	tetraethylammonium chloride	2.8	h
129	278ka	639092-18-5	C38H68F18P2	trihexyltetradecylphosphanium trifluoridotris(pentafluoroethyl)phosphate	3	h
130	279ka	460092-03-9	C34H68F6NO4PS2	trihexyltetradecylphosphanium bis(trifluoromethylsulfonyl)amide	3.48	h
131	280ka	374683-55-3	C32H68BF4P	trihexyltetradecylphosphanium tetrafluoridoboranuide	3.3	h
132	281ka	916730-43-3	C28H44BO4P	tetrabutylphosphanium bis[1,2-benzenediolato(2-)]borate	3.11	h
133	282ka	547718-83-2	C33H71O3PS	trihexyltetradecylphosphanium methanesulfonate	2.58	h
134	283ka	654057-97-3	C32H68BrP	trihexyltetradecylphosphanium bromide	2.85	h
135	284ka	465527-59-7	C48H102O2P2	trihexyltetradecylphosphanium bis(2,4,4-trimethylpentyl)phosphinate	3.3	h
136	285ka	701921-71-3	C34H68N3P	trihexyltetradecylphosphonium dicyanamide	3.3	h
137	286ka	374683-44-0	C32H68F6P2	trihexyltetradecylphosphanium hexafluoridophosphate	3.3	h
138	287ka	465527-65-5	C42H87O2P	trihexyltetradecylphosphanium decanoate	3.6	h
139	288ka	3115-68-2	C16H36BrP	tetrabutylphosphanium bromide	2.61	h
140	302ka	874-80-6	C9H14BrN	1-butylpyridinium bromide	1.77	e
141	305ka	712355-12-9	C12H16N4	1-butyl-3-methylpyridinium dicyanidoamide	1.22	h
142	306ka	1124-64-7	C9H14ClN	1-butylpyridinium chloride	1.7	h
143	307ka	849418-12-8	C11H14F6N2O5S2	1-(2-Ethoxyethyl)pyridinium Bis(trifluoromethylsulfonyl)amide	1.48	e
144	308ka	108153-25-9	C9H14BrNO	1-(2-ethoxyethyl)pyridinium bromide	1.55	e
145	309ka	752260-02-9	C9H10F6N2O5S2	1-(2-hydroxyethyl)pyridinium bis(trifluoromethylsulfonyl)amide	2.65	e
146	310ka	69095-13-2	C7H10INO	1-(2-hydroxyethyl)pyridinium iodide	2.69	e
147	311ka	863663-01-8	C10H12F6N2O5S2	1-(2-methoxyethyl)pyridinium bis(trifluoromethylsulfonyl)amide	2.09	e
148	312ka	827027-29-2	C10H12F6N2O5S2	1-(3-hydroxypropyl)pyridinium bis(trifluoromethylsulfonyl)amide	2.56	e
149	313ka	1049752-00-2	C11H14F6N2O5S2	1-(3-methoxypropyl)pyridinium bis(trifluoromethylsulfonyl)amide	2.06	e
150	314ka	1049751-98-5	C10H12F6N2O5S2	1-(ethoxymethyl)pyridinium bis(trifluoromethylsulfonyl)amide	2.14	e
151	315ka	21379-36-2	C8H12ClNO	1-(ethoxymethyl)pyridinium chloride	2.06	e
152	316ka	286453-46-1	C10H16BF4N	1-Butyl-2-methylpyridinium Tetrafluoroborate	0.82	e
153	317ka	952429-71-9	C11H18BF4N	1-Butyl-3,4-dimethylpyridinium Tetrafluoroborate	1.1	e
154	318ka	952429-72-0	C11H18BF4N	1-Butyl-3,5-dimethylpyridinium Tetrafluoroborate	1.17	e
155	319ka	597581-48-1	C10H16BF4N	1-Butyl-3-methylpyridinium Tetrafluoroborate	1.27	e
156	320ka	343952-33-0	C10H16BF4N	1-Butyl-4-methylpyridinium Tetrafluoroborate	1.54	e
157	321ka	203389-28-0	C9H14BF4N	1-butylpyridinium tetrafluoroborate	1.8	e
158	322ka			1-Cyanomethylpyridinium Bis(trifluoromethylsulfonyl)amide	2.51	e
159	323ka			1-Cyanomethylpyridinium Chloride	2.47	e
160	324ka	952429-73-1	C12H20BF4N	1-Hexyl-4-methylpyridinium Tetrafluoroborate	1.48	e
161	325ka	936239-96-2	C14H24BF4N	1-Octyl-4-methylpyridinium Tetrafluoroborate	1.22	e
162	326ka	141645-91-2	C14H24ClN	1-Octyl-4-methylpyridinium Chloride	1.11	e
163	327ka	4086-73-1	C13H22ClN	1-octylpyridinium chloride	1.6	e
164	328ka	900797-79-7	C13H19F6N3O4S2	4-(Dimethylamino)-1-butylpyridinium Bis(trifluoromethylsulfonyl)amide	0.59	e
165	329ka	82522-15-4	C11H19ClN2	4-(Dimethylamino)-1-butylpyridinium Chloride	0.6	e
166	330ka	900797-77-5	C11H15F6N3O4S2	4-(dimethylamino)-1-ethylpyridinium bis(trifluoromethylsulfonyl)amide	0.93	e
167	331ka	114203-57-5	C9H15BrN2	4-(dimethylamino)-1-ethylpyridinium bromide	0.99	e
168	332ka	1012794-14-7	C13H23ClN2	4-(dimethylamino)-1-hexylpyridinium chloride	0.5	e
169	333ka	872672-57-6	C15H23F6N3O4S2	4-(dimethylamino)-1-hexylpyridinium bis(trifluoromethylsulfonyl)amide	0.81	e
170	336ka	187863-16-7	C8H12ClNO	1-(3-hydroxypropyl)pyridinium chloride	2.65	h
171	337ka	209679-88-9	C8H12ClNO	1-(2-methoxyethyl)pyridinium chloride	2.07	h
172	338ka	1012794-07-8	C9H14ClNO	1-(3-methoxypropyl)pyridinium chloride	2.15	h
173	341ka	401788-99-6	C10H16F6NP	1-butyl-4-methylpyridinium hexafluorophosphate	1.43	h
174	342ka	941580-56-9	C9H12F3NO6S2	1-(3-sulfopropyl)pyridinium trifluoromethanesulfonate	3	h
175	343ka			1-octyl-3-methylpyridinium chloride	0.64	h
176	344ka	112400-85-8	C10H16ClN	1-butyl-2-methylpyridinium chloride	0.7	h
177	345ka	916730-30-8	C11H18ClN	1-butyl-3,4-dimethylpyridinium chloride	0.85	h
178	346ka	916730-31-9	C11H18ClN	1-butyl-3,5-dimethylpyridinium chloride	0.99	h
179	347ka	916730-40-0	C12H20ClN	1-hexyl-3-methylpyridinium chloride	1.06	h
180	348ka	125652-55-3	C10H16ClN	1-butyl-3-methylpyridinium chloride	1.15	h
181	350ka	845835-03-2	C10H16F6NP	1-butyl-3-methylpyridinium hexafluorophosphate	1.24	h
182	351ka	384347-06-2	C15H22F6N2O4S2	1-octylpyridinium bis(trifluoromethylsulfonyl)amide	1.4	h
183	352ka	62409-49-8	C12H20ClN	1-hexyl-4-methylpyridinium chloride	1.44	h
184	353ka	112400-86-9	C10H16ClN	1-butyl-4-methylpyridinium chloride	1.44	h
185	354ka	742099-83-8	C14H16BN5	1-butyl-4-methylpyridinium tetracyanidoboranuide	1.46	h
186	355ka	53385-72-1	C10H16BrN	1-pentylpyridinium bromide	1.52	h
187	356ka	890532-45-3	C12H16F6N2O4S2	1-pentylpyridinium bis(trifluoromethylsulfonyl)amide	1.55	h
188	357ka	883860-38-6	C16H16F18NP	1-butyl-4-methylpyridinium trifluoridotris(pentafluoroethyl)phosphate	1.64	h
189	358ka	885456-20-2	C10H17NO4S	1-butylpyridinium O-methyl sulfate	1.75	h
190	359ka	186088-50-6	C9H14F6NP	1-butylpyridinium hexafluorophosphate	1.84	h
191	360ka	390423-43-5	C10H14F3NO3S	1-butylpyridinium trifluoromethanesulfonate	1.87	h
192	361ka	6220-15-1	C11H18ClN	1-hexylpyridinium chloride	1.72	h
193	362ka	797789-00-5	C11H18F6NP	1-hexylpyridinium hexafluorophosphate	1.76	h
194	363ka	623167-81-7	C12H18F3NO3S	1-hexylpyridinium trifluoromethanesulfonate	1.84	h
195	364ka	460983-97-5	C13H18F6N2O4S2	1-hexylpyridinium bis(trifluoromethylsulfonyl)amide	1.85	h
196	365ka	2294-38-4	C7H10ClN	1-ethylpyridinium chloride	2.1	h
197	366ka	873-71-2	C8H12BrN	1-propylpyridinium bromide	2.22	h
198	367ka	1104525-90-7	C10H12F6N2O4S2	1-propylpyridinium bis(trifluoromethylsulfonyl)amide	2.21	h
199	373ka	454234-70-9	C9H14ClNO2	3-hydroxy-1-(propoxymethyl)pyridinium chloride	3.5	i
200	374ka	454234-74-3	C13H22ClNO2	1-[(heptyloxy)methyl]-3-hydroxypyridinium chloride	3.5	i
201	375ka	454234-78-7	C17H30ClNO2	3-hydroxy-1-[(undecyloxy)methyl]pyridinium chloride	2.5	i
202	376ka	1127350-73-5	C13H18N2O6S	3-hydroxy-1-(propoxymethyl)pyridinium acesulfamates	3.5	i
203	377ka	1127350-74-6	C14H20N2O6S	1-butoxymethyl-3-hydroxypyridinium acesulfamates	3.5	i
204	378ka	1127350-76-8	C16H24N2O6S	1-hexyloxymethyl-3-hydroxypyridinium acesulfamates	3.6	i
205	379ka	1127350-77-9	C17H26N2O6S	1-[(heptyloxy)methyl]-3-hydroxypyridinium 6-methyl-2,2-dioxo-1,2,3-oxathiazin-4-onate	3.5	i
206	380ka	1127350-78-0	C21H34N2O6S	3-hydroxy-1-undecyloxymethylpyridinium acesultamates	2.5	i
207	382ka	1127350-80-4	C17H20N2O5S	1-butoxymethyl-3-hydroxypyridinium saccharinates	3.5	i
208	383ka	1127350-79-1	C16H18N2O5S	3-hydroxy-1-(propoxymethyl)pyridinium 1,1-dioxo-1,2-dihydrobenzo[d]isothiazol-3-onate	3.4	i
209	384ka	1127350-82-6	C19H24N2O5S	1-[(hexyloxy)methyl]-3-hydroxypyridinium 1,1-dioxo-1,2-dihydrobenzo[d]isothiazol-3-onate	3.6	i
210	385ka	1127350-83-7	C20H26N2O5S	1-[(heptyloxy)methyl]-3-hydroxypyridinium 1,1-dioxo-1,2-dihydrobenzo[d]isothiazol-3-onate	3.5	i
211	386ka	1127350-84-8	C24H34N2O5S	3-hydroxy-1-[(undecyloxy)methyl]pyridinium 1,1-dioxo-1,2-dihydrobenzo[d]isothiazol-3-onate	2.4	i
212	411ka	223437-11-4	C11H20F6N2O4S2	1-butyl-1-methylpyrrolidinium bis(trifluoromethylsulfonyl)amide	2.13	e
213	412ka	663628-46-4	C11H20F6N2O5S2	1-(2-ethoxyethyl)-1-methylpyrrolidinium bis(trifluoromethylsulfonyl)amide	2.55	e
214	413ka	757212-04-7	C9H16F6N2O5S2	1-(2-hydroxyethyl)-1-methylpyrrolidinium bis(trifluoromethylsulfonyl)amide	2.61	e
215	414ka	757240-24-7	C10H18F6N2O5S2	1-(2-methoxyethyl)-1-methylpyrrolidinium bis(trifluoromethylsulfonyl)amide	2.11	e
216	415ka	1017553-47-7	C9H13F6N3O4S2	1-(cyanomethyl)-1-methylpyrrolidinium bis(trifluoromethylsulfonyl)amide	2.83	e
217	417ka		C10H18F6N2O5S2	1-(3-hydroxypropyl)-1-methylpyrrolidinium bis(trifluoromethylsulfonyl)amide	2.77	e
218	418ka		C11H20F6N2O5S2	1-(3-methoxypropyl)-1-methylpyrrolidinium bis(trifluoromethylsulfonyl)amide	2.71	e
219	419ka	151263-00-2	C8H18ClNO	1-(ethoxymethyl)-1-methylpyrrolidinium chloride	1.86	e
220	420ka		C10H18F6N2O5S2	1-(ethoxymethyl)-1-methylpyrrolidinium bis(trifluoromethylsulfonyl)amide	2.22	e
221	421ka	952429-75-3	C16H34BF4N	1,1-Dihexylpyrrolidinium Tetrafluoroborate	2.08	e
222	422ka	345984-11-4	C9H20BF4N	1-Butyl-1-methylpyrrolidinium Tetrafluoroborate	1.91	e
223	423ka	93457-69-3	C9H20BrN	1-butyl-1-methylpyrrolidinium bromide	1.93	e
224	424ka			1-Butyl-1-methylpyrrolidinium Dicyanamide	1.98	e
225	425ka	909398-59-0	C11H24ClN	1-hexyl-1-methylpyrrolidinium chloride	2.48	e
226	426ka	952429-74-2	C13H28BF4N	1-Methyl-1-octylpyrrolidinium Tetrafluoroborate	2.02	e
227	427ka	909398-60-3	C13H28ClN	1-methyl-1-octylpyrrolidinium chloride	2.36	e
228	428ka	54770-67-1	C7H16INO	1-(2-hydroxyethyl)-1-methylpyrrolidinium iodide	2.63	h
229	429ka	479500-35-1	C9H20ClN	1-butyl-1-methylpyrrolidinium chloride	1.92	h
230	430ka	941584-15-2	C8H18ClNO	1-(3-hydroxypropyl)-1-methylpyrrolidinium chloride	2.86	h
231	431ka	1012794-01-2	C8H18ClNO	1-(2-methoxyethyl)-1-methylpyrrolidinium chloride	2.38	h
232	432ka	833446-39-2	C9H20BrNO	1-(2-ethoxyethyl)-1-methylpyrrolidinium bromide	2.6	h
233	433ka	1012794-05-6	C9H20ClNO	1-(3-methoxypropyl)-1-methylpyrrolidinium chloride	2.74	h
234	434ka	851856-47-8	C15H20F18NP	1-butyl-1-methylpyrrolidinium trifluoridotris(pentafluoroethyl)phosphate	3	h
235	439ka	194986-69-1	C7H13ClN2	1-(cyanomethyl)-1-methylpyrrolidinium chloride	2.88	h
236	440ka	380497-19-8	C13H24F6N2O4S2	1-hexyl-1-methylpyrrolidinium bis(trifluoromethylsulfonyl)amide	2.6	h

## Sheet: SM T2
EC50 values for Vibrio fischeri illumination inhibition test
No.	Symbol (given in this work)	CAS number (if available)	Molecular formlua	Name	Vibrio fischeri	ref.
					log10 EC50 [μM]
1	002ka	64697-40-1	C12H23ClN2	3-Methyl-1-octylimidazolium Chloride	1.04532	l
2	004ka	244193-52-0	C12H23BF4N2	3-Methyl-1-octylimidazolium Tetrafluoroborate	1.4014	l
3	007ka	244193-55-3	C13H25BF4N2	3-Methyl-1-nonylimidazolium Tetrafluoroborate	0.718	b
4	008ka	244193-48-4	C7H13BF4N2	3-Methyl-1-propylimidazolium Tetrafluoroborate	3.94002	l
5	009ka	174501-65-6	C8H15BF4N2	1-butyl-3-methylimidazolium tetrafluoroborate	3.54407	k
6	010ka	85100-77-2	C8H15BrN2	1-Butyl-3-methylimidazolium Bromide	3.06819	l
7	011ka	581101-91-9	C9H17BF4N2	1-Butyl-3-ethylimidazolium Tetrafluoroborate	2.80414	l
8	014ka	244193-49-5	C9H17BF4N2	1-methyl-3-pentylimidazolium tetrafluoroborate	3.14	b
9	016ka	244193-50-8	C10H19BF4N2	1-Hexyl-3-methylimidazolium Tetrafluoroborate	3.18	b
10	018ka	393550-29-3	C11H21BF4N2	1-Hexyl-3-ethylimidazolium Tetrafluoroborate	2.15	b
11	021ka	244193-51-9	C11H21BF4N2	1-heptyl-3-methylimidazolium Tetrafluoroborate	2.44	b
12	022ka	171058-18-7	C14H27ClN2	1-decyl-3-methylimidazolium chloride	0.498	b
13	024ka	244193-56-4	C14H27BF4N2	1-Decyl-3-methylimidazolium Tetrafluoroborate	-0.179142	l
14	029ka	174899-83-3	C10H15F6N3O4S2	1-butyl-3-methylimidazolium bis(trifluoromethylsulfonyl)imide	2.47276	l
15	031ka			3-(2-hydroxyethyl)-1-methylimidazolium bis(trifluoromethylsulfonyl)imide	4.07918	l
16	038ka	342573-75-5	C8H16N2O4S	1-Ethyl-3-methylimidazolium Ethyl Sulfate	4.2833	l
17	039ka	79917-90-1	C8H15ClN2	1-Butyl-3-methylimidazolium Chloride	3.47276	l
18	041ka	174501-64-5	C8H15F6N2P	1-Butyl-3-methylimidazolium Hexafluorophosphate	3.51455	l
19	057ka	174899-66-2	C9H15F3N2O3S	1-Butyl-3-methylimidazolium Trifluoromethanesulfonate	3.5966	l
20	062ka	445473-58-5	C16H32N2O4S	1-Butyl-3-methylimidazolium 1-Octylsulfate	1.82347	l
21	067ka	65039-05-6	C8H15IN2	1-Butyl-3-methylimidazolium Iodide	3.59218	l
22	068ka	376650-04-3	C18H19BN2O4	1-Ethyl-3-methylimidazolium Bis[1,2-benzenediolato(2-)-O1,O2]borate	2.95904	l
23	069ka	852616-00-3	C10H11F10N2O2P	1-ethyl-3-methylimidazolium bis(pentafluoroethyl)phosphinate	3.04922	l
24	078ka	61546-01-8	C20H39ClN2	1-hexadecyl-3-methylimidazolium chloride	0.230449	l
25	085ka	171058-19-8	C22H43ClN2	3-Methyl-1-octadecylimidazolium Chloride	1.25527	l
26	097ka	382150-50-7	C12H19F6N3O4S2	1-hexyl-3-methylimidazolium bis(trifluoromethylsulfonyl)amide	2.05308	l
27	105ka	1012794-00-1	C6H11INO2	1-(2-hydroxyethyl)-3-methylimidazolium iodide	3.88705	l
28	106ka	355011-34-6	C7H13ClN2O	1-(3-hydroxypropyl)-3-methylimidazolium chloride	4.30103	l
29	107ka	945996-02-1	C7H13ClN2O	1-(ethoxymethyl)-3-methylimidazolium chloride	4.32838	l
30	108ka	1012793-99-5	C8H15BrN2O	1-(2-ethoxyethyl)-3-methylimidazolium bromide	4.30103	l
31	109ka	474972-46-8	C7H13ClN2O	1-(2-methoxyethyl)-3-methylimidazolium chloride	4.18469	l
32	110ka	1012794-06-7	C8H15ClN2O	1-(3-methoxypropyl)-3-methylimidazolium chloride	4.30103	l
33	112ka	937720-90-6	C8H8F6N4O4S2	1-(cyanomethyl)-3-methylimidazolium bis(trifluoromethylsulfonyl)amide	3.81023	l
34	113ka	827027-30-5	C9H13F6N3O5S2	1-(3-hydroxypropyl)-3-methylimidazolium bis(trifluoromethylsulfonyl)amide	3.89042	l
35	114ka	945996-13-4	C9H13F6N3O5S2	1-(ethoxymethyl)-3-methylimidazolium bis(trifluoromethylsulfonyl)amide	3.00432	l
36	115ka	178631-01-1	C9H13F6N3O5S2	1-(2-methoxyethyl)-3-methylimidazolium bis(trifluoromethylsulfonyl)amide	2.83632	l
37	116ka	778593-17-2	C10H15F6N3O5S2	1-(2-ethoxyethyl)-3-methylimidazolium bis(trifluoromethylsulfonyl)amide	2.96332	l
38	117ka	1015254-36-0	C10H15F6N3O5S2	1-(3-methoxypropyl)-3-methylimidazolium bis(trifluoromethylsulfonyl)amide	3.23805	l
39	136ka	710336-91-7	C10H15F6N3	1-butyl-3-methylimidazolium bis(trifluoromethyl)amide	3.45637	l
40	191ka	410522-18-8	C15H22N2O3S	1-butyl-3-methylimidazolium 4-methylbenzenesulfonate	3.52634	l
41	201ka	697248-62-7	C17H23N3O3S	1-hexyl-3-methylimidazolium 1,1-dioxo-1,2-dihydrobenzo[d]isothiazol-3-onate	2.66745	l
42	210ka	258273-76-6	C10H20F6N2O4S2	Butylethyldimethylammonium Bis(trifluoromethylsulfonyl)amide	2.84261	l
43	214ka	557788-37-1	C9H18F6N2O5S2	Ethyl(2-methoxyethyl)dimethylammonium Bis(trifluoromethylsulfonyl)amide	2.96142	l
44	218ka	625835-85-0	C8H20ClN	butylethyldimethylammonium chloride	4.30103	f
45	239ka	58937-21-6	C6H15NO3	(2-hydroxyethyl)dimethylammonium acetate	3.46538	l
46	240ka	176158-74-0	C6H15NO4	(2-hydroxyethyl)dimethylammonium hydroxyacetate	3.51851	l
47	270ka	852826-83-6	C10H18F6N2O6S2	(ethoxycarbonylmethyl)ethyldimethylammonium bis(trifluoromethylsulfonyl)amide	2.96755	l
48	273ka	1217356-13-2	C6H18N2O5S	bis(2-methoxyethyl)ammonium sulfamate	3.6637	l
49	306ka	1124-64-7	C9H14ClN	1-butylpyridinium chloride	3.17609	f
50	327ka	4086-73-1	C13H22ClN	1-octylpyridinium chloride	1.69197	l
51	328ka	900797-79-7	C13H19F6N3O4S2	4-(Dimethylamino)-1-butylpyridinium Bis(trifluoromethylsulfonyl)amide	1.8451	f
52	329ka	82522-15-4	C11H19ClN2	4-(Dimethylamino)-1-butylpyridinium Chloride	2.51851	f
53	411ka	223437-11-4	C11H20F6N2O4S2	1-butyl-1-methylpyrrolidinium bis(trifluoromethylsulfonyl)amide	2.54407	f
54	412ka	663628-46-4	C11H20F6N2O5S2	1-(2-ethoxyethyl)-1-methylpyrrolidinium bis(trifluoromethylsulfonyl)amide	2.9722	l
55	429ka	479500-35-1	C9H20ClN	1-butyl-1-methylpyrrolidinium chloride	4.30103	f
56	440ka	380497-19-8	C13H24F6N2O4S2	1-hexyl-1-methylpyrrolidinium bis(trifluoromethylsulfonyl)amide	2.39794	l
57	451ka	1107545-20-9	C11H18F6N2O6S2	1-(ethoxycarbonylmethyl)-1-methylpyrrolidinium bis(trifluoromethylsulfonyl)amide	3.233	l

## Sheet: SM T3
MIC values for Escherichia coli growth inhibition test
No.	Symbol (given in this work)	CAS number (if available)	Molecular formlua	Name	Escherichia coli	ref.
					log10 MIC [μM]
1	137ka	615538-92-6	C7H12N2O3	1-methylimidazolium 2-hydroxypropanoate	3.76418	p
2	144ka	615538-93-7	C8H14N2O3	1-ethylimidazolium 2-hydroxypropanoate	3.72997	p
3	145ka	1361335-95-6	C11H22N4O3	(2-hydroxyethyl)trimethylammonium L-histidinate	4.67117	n
4	146ka		C18H34N2O4	1-(undecyloxymethyl)imidazolium (2S)-2-hydroxypropanoate	2.26007	p
5	147ka		C17H32N2O4	1-(decyloxymethyl)imidazolium (2S)-2-hydroxypropanoate	1.97864	p
6	148ka	898558-91-3	C16H30N2O4	1-(nonyloxymethyl)imidazolium (2S)-2-hydroxypropanoate	2.29885	p
7	149ka	898558-90-2	C15H28N2O4	1-(octyloxymethyl)imidazolium (2S)-2-hydroxypropanoate	2.31806	p
8	150ka		C14H26N2O4	1-(heptyloxymethyl)imidazolium (2S)-2-hydroxypropanoate	2.64048	p
9	151ka	885224-29-3	C13H24N2O4	1-(hexyloxymethyl)imidazolium (2S)-2-hydroxypropanoate	2.96332	p
10	152ka	885224-28-2	C11H20N2O4	1-(butoxymethyl)imidazolium (2S)-2-hydroxypropanoate	3.61278	p
11	153ka	898558-89-9	C18H34N2O3	1-dodecylimidazolium (2S)-2-hydroxypropanoate	1.67943	p
12	154ka	885224-27-1	C17H32N2O3	1-undecylimidazolium (2S)-2-hydroxypropanoate	1.69897	p
13	155ka	898223-27-3	C16H30N2O3	1-decylimidazolium (2S)-2-hydroxypropanoate	2.02119	p
14	156ka	898558-92-4	C19H36N2O4	1-(dodecyloxymethyl)imidazolium (2S)-2-hydroxypropanoate	1.943	p
15	157ka	898558-88-8	C15H28N2O3	1-nonylimidazolium (2S)-2-hydroxypropanoate	2.34242	p
16	158ka	898558-87-7	C14H26N2O3	1-octylimidazolium (2S)-2-hydroxypropanoate	2.66558	p
17	159ka	615539-05-4	C12H22N2O4	1-(pentoxymethyl)imidazolium 2-hydroxypropanoate	2.98632	p
18	160ka	615539-04-3	C11H20N2O4	1-(butoxymethyl)imidazolium 2-hydroxypropanoate	3.31175	p
19	161ka	615539-03-2	C18H34N2O	1-dodecylimidazolium 2-hydroxypropanoate	2.2833	p
20	162ka	615539-02-1	C17H32N2O3	1-undecylimidazolium 2-hydroxypropanoate	2.30103	p
21	163ka	615539-01-0	C16H30N2O3	1-decylimidazolium 2-hydroxypropanoate	2.32222	p
22	164ka	615539-00-9	C15H28N2O3	1-nonylimidazolium 2-hydroxypropanoate	2.34242	p
23	165ka	615538-99-3	C14H26N2O3	1-octylimidazolium 2-hydroxypropanoate	2.66558	p
24	166ka	615538-98-2	C13H24N2O3	1-heptylimidazolium 2-hydroxypropanoate	3.29003	p
25	167ka	615538-97-1	C12H22N2O3	1-hexylimidazolium 2-hydroxypropanoate	3.31597	p
26	168ka	615538-96-0	C11H20N2O3	1-pentylimidazolium 2-hydroxypropanoate	3.64147	p
27	169ka	615538-95-9	C10H18N2O3	1-butylimidazolium 2-hydroxypropanoate	3.66932	p
28	170ka	615539-06-5	C13H24N2O4	1-(hexyloxymethyl)imidazolium 2-hydroxypropanoate	2.66181	p
29	171ka	615539-07-6	C14H26N2O4	1-(heptyloxymethyl)imidazolium 2-hydroxypropanoate	2.33846	p
30	172ka		C13H24N2O3	1-heptylimidazolium (2S)-2-hydroxypropanoate	2.98989	p
31	173ka	885224-26-0	C12H22N2O3	1-hexylimidazolium (2S)-2-hydroxypropanoate	3.31597	p
32	174ka	885224-25-9	C10H18N2O3	1-butylimidazolium (2S)-2-hydroxypropanoate	3.66932	p
33	175ka		C9H16N2O3	1-propylimidazolium (2S)-2-hydroxypropanoate	3.6981	p
34	176ka		C8H14N2O3	1-ethylimidazolium (2S)-2-hydroxypropanoate	3.72997	p
35	177ka	1010075-76-9	C7H12N2O3	1-methylimidazolium (2S)-2-hydroxypropanoate	3.76418	p
36	178ka	615539-12-3	C19H36N2O4	1-(dodecyloxymethyl)imidazolium 2-hydroxypropanoate	2.54407	p
37	179ka	615539-11-2	C18H34N2O4	1-(undecyloxymethyl)imidazolium 2-hydroxypropanoate	1.96047	p
38	180ka	615539-10-1	C17H32N2O4	1-(decyloxymethyl)imidazolium 2-hydroxypropanoate	1.97864	p
39	181ka	615539-09-8	C16H30N2O4	1-(nonyloxymethyl)imidazolium 2-hydroxypropanoate	1.69461	p
40	182ka	615539-08-7	C15H28N2O4	1-(octyloxymethyl)imidazolium 2-hydroxypropanoate	2.01703	p
41	183ka	615538-94-8	C9H16N2O3	1-propylimidazolium 2-hydroxypropanoate	3.6981	p
42	243ka	1361335-90-1	C9H21N3O4	(2-hydroxyethyl)trimethylammonium L-asparaginate	4.9722	n
43	244ka	1361335-92-3	C10H23N3O4	(2-hydroxyethyl)trimethylammonium L-glutaminate	5.09691	n
44	245ka	85567-49-3	C10H22N2O5	(2-hydroxyethyl)trimethylammonium hydrogen L-glutamate	5.69897	n
45	246ka	1361335-95-6	C11H22N4O3	(2-hydroxyethyl)trimethylammonium L-histidinate	4.67117	n
46	247ka	143896-91-7	C9H20N2O5	(2-hydroxyethyl)trimethylammonium hydrogen L-aspartate	5.69897	n
47	248ka	911459-16-0	C10H24N2O3S	(2-hydroxyethyl)trimethylammonium L-methioninate	4.49554	n
48	249ka	1334683-42-9	C9H22N2O4	(2-hydroxyethyl)trimethylammonium L-threoninate	4.49554	n
49	250ka	1361335-80-9	C8H20N2O4	(2-hydroxyethyl)trimethylammonium L-serinate	4.49554	n
50	251ka	1361335-84-3	C11H26N2O3	(2-hydroxyethyl)trimethylammonium L-isoleucinate	4.67117	n
51	252ka	1361335-83-2	C11H26N2O3	(2-hydroxyethyl)trimethylammonium L-leucinate	4.67117	n
52	253ka	1361335-81-0	C10H24N2O3	(2-hydroxyethyl)trimethylammonium L-valinate	4.67117	n
53	254ka	1361335-79-6	C8H20N2O3	(2-hydroxyethyl)trimethylammonium L-alaninate	4.67117	n
54	255ka	1248335-95-6	C7H18N2O3	(2-hydroxyethyl)trimethylammonium glycinate	5.09691	n
55	256ka	14586-35-7	C7H17NO3	(2-hydroxyethyl)trimethylammonium acetate	5.69897	n
56	259ka	947181-52-4	C10H22N2O3	(2-hydroxyethyl)trimethylammonium L-prolinate	4.67117	n
57	260ka	1361335-97-8	C11H27N5O3	(2-hydroxyethyl)trimethylammonium L-argininate	4.67117	n
58	261ka	1361335-94-5	C11H27N3O3	(2-hydroxyethyl)trimethylammonium L-lysinate	4.49554	n
59	267ka	67-48-1	C5H14ClNO	(2-hydroxyethyl)trimethylammonium chloride	5.87506	n
60	279ka	460092-03-9	C34H68F6NO4PS2	trihexyltetradecylphosphanium bis(trifluoromethylsulfonyl)amide	2.80889	m
61	280ka	374683-55-3	C32H68BF4P	trihexyltetradecylphosphanium tetrafluoridoboranuide	2.9425	m
62	284ka	465527-59-7	C48H102O2P2	trihexyltetradecylphosphanium bis(2,4,4-trimethylpentyl)phosphinate	2.81425	m
63	285ka	701921-71-3	C34H68N3P	trihexyltetradecylphosphonium dicyanamide	2.35603	m
64	286ka	374683-44-0	C32H68F6P2	trihexyltetradecylphosphanium hexafluoridophosphate	1.6902	m
65	287ka	465527-65-5	C42H87O2P	trihexyltetradecylphosphanium decanoate	2.58206	m
66	289ka	258864-54-9	C32H68ClP	trihexyltetradecylphosphanium chloride	1.49136	m
67	290ka	120224-02-4	C20H44BrP	ethyltrihexylphosphonium bromide	1.30103	m
68	291ka	465527-67-7	C33H68F3O3PS	trihexyltetradecylphosphanium trifluoromethanesulfonat	2.89763	m
69	292ka	911839-29-7	C21H46BrP	trihexylpropylphosphonium bromide	1	m
70	293ka	911839-30-0	C22H48BrP	butyltrihexylphosphonium bromide	0.672098	m
71	294ka	121259-84-5	C24H52ClP	tetrahexylphosphanium chloride	0.39794	m
72	295ka	850134-84-8	C25H54ClP	heptyltrihexylphosphonium chloride	0.672098	m
73	296ka	34283-78-8	C24H52BrP	tetrahexylphosphanium bromide	1.24797	m
74	297ka	850134-88-2	C34H72ClP	hexadecyltrihexylphosphonium chloride	2.05308	m
75	298ka	850134-87-1	C30H64ClP	dodecyltrihexylphosphanium chloride	1.20412	m
76	299ka	850134-86-0	C28H60ClP	decyltrihexylphosphanium chloride	1.23045	m
77	300ka	850134-85-9	C26H56ClP	trihexyloctylphosphanium chloride	0.963788	m
78	388ka	435346-44-4	C19H33N3O5	3-(aminocarbonyl)-1-[(dodecyloxy)methyl]pyridinium nitrate	2.21219	o
79	389ka	435346-42-2	C19H33IN2O2	3-(aminocarbonyl)-1-[(dodecyloxy)methyl]pyridinium iodide	2.4456	o
80	391ka	435346-52-4	C19H33BF4N2O2	3-(aminocarbonyl)-1-[(dodecyloxy)methyl]pyridinium tetrafluoroborate	2.18469	o
81	392ka	435346-53-5	C21H36N2O4	3-(aminocarbonyl)-1-[(dodecyloxy)methyl]pyridinium acetate	1.91487	o
82	399ka	435346-41-1	C19H33BrN2O2	3-(aminocarbonyl)-1-[(dodecyloxy)methyl]pyridinium bromide	2.19312	o
83	400ka	435346-34-2	C17H29ClN2O2	3-(aminocarbonyl)-1-[(decyloxy)methyl]pyridinium chloride	2.58092	o
84	401ka	435346-35-3	C18H31ClN2O2	3-(aminocarbonyl)-1-[(undecyloxy)methyl]pyridinium chloride	2.56229	o
85	402ka	435346-36-4	C19H33ClN2O2	3-(aminocarbonyl)-1-[(dodecyloxy)methyl]pyridinium chloride	2.54531	o
86	403ka	435346-40-0	C19H31ClN2O2	3-(aminocarbonyl)-1-[(cyclododecyloxy)methyl]pyridinium chloride	3.14922	o
87	405ka	435346-78-4	C19H33ClN2O2	4-(aminocarbonyl)-1-[(dodecyloxy)methyl]pyridinium chloride	1.94349	o
88	406ka	435346-77-3	C18H31ClN2O2	4-(aminocarbonyl)-1-[(undecyloxy)methyl]pyridinium chloride	2.26007	o
89	407ka	435346-66-0	C29H53ClN2O4	3-[[[[(decyloxy)methoxy]methyl]amino]carbonyl]-1-[(decyloxy)methyl]pyridinium chloride	2.67486	o

## Sheet: SM T4
EC50 values for Pseudokirchneriella subcapitata growth inhibition test
No.	Symbol (given in this work)	CAS number (if available)	Molecular formlua	Name	Pseudokirchneriella subcapitata	ref.
					log10 EC50 [μM]
1	026ka	35487-17-3	C4H6ClN2	1-methylimidazolium chloride	2.84092	c
2	028ka		C6H10Cl2N2	1-methyl 3-(2-chloroethyl) imidazolium chloride	2.62439	c
3	029ka	174899-83-3	C10H15F6N3O4S2	1-butyl-3-methylimidazolium bis(trifluoromethylsulfonyl)imide	1.80072	c
4	030ka			3-(2-chloroethyl)-1-methylimidazolium bis(trifluoromethylsulfonyl)imide	2.22324	c
5	031ka			3-(2-hydroxyethyl)-1-methylimidazolium bis(trifluoromethylsulfonyl)imide	2.14364	c
6	032ka			3-(2-chloropropyl)-1-methylimidazolium chloride	2.22891	c
7	033ka			1-methyl-3-[(trimethylsilyl)methyl]-imidazolium bromide	1.63347	c
8	034ka			1-(2-Chloroethyl)imidazolium chloride	2.67578	c
9	411ka	223437-11-4	C11H20F6N2O4S2	1-butyl-1-methylpyrrolidinium bis(trifluoromethylsulfonyl)amide	2.37475	c
10	454ka			triethylsulfonium bromide	2.34203	c

## Sheet: SM T5
EC50 values for Scenedesmus vacuolatus reproduction inhibition test
No.	Symbol (given in this work)	CAS number (if available)	Molecular formlua	Name	Scenedesmus vacuolatus	ref.
					log10 EC50 [μM]
1	002ka	64697-40-1	C12H23ClN2	3-Methyl-1-octylimidazolium Chloride	0.00175	l
2	004ka	244193-52-0	C12H23BF4N2	3-Methyl-1-octylimidazolium Tetrafluoroborate	0.00576	l
3	009ka	174501-65-6	C8H15BF4N2	1-butyl-3-methylimidazolium tetrafluoroborate	2.11394	k
4	029ka	174899-83-3	C10H15F6N3O4S2	1-butyl-3-methylimidazolium bis(trifluoromethylsulfonyl)imide	1.80277	l
5	031ka			3-(2-hydroxyethyl)-1-methylimidazolium bis(trifluoromethylsulfonyl)imide	2.15229	l
6	039ka	79917-90-1	C8H15ClN2	1-Butyl-3-methylimidazolium Chloride	2.24797	l
7	040ka	304680-35-1	C10H19F6N2P	1-hexyl-3-methylimidazolium Hexafluorophosphate	0.338456	l
8	062ka	445473-58-5	C16H32N2O4S	1-Butyl-3-methylimidazolium 1-Octylsulfate	1.72346	l
9	068ka	376650-04-3	C18H19BN2O4	1-Ethyl-3-methylimidazolium Bis[1,2-benzenediolato(2-)-O1,O2]borate	1.4183	l
10	078ka	61546-01-8	C20H39ClN2	1-hexadecyl-3-methylimidazolium chloride	-2	l
11	085ka	171058-19-8	C22H43ClN2	3-Methyl-1-octadecylimidazolium Chloride	-2	l
12	097ka	382150-50-7	C12H19F6N3O4S2	1-hexyl-3-methylimidazolium bis(trifluoromethylsulfonyl)amide	0.0374265	l
13	105ka	1012794-00-1	C6H11INO2	1-(2-hydroxyethyl)-3-methylimidazolium iodide	2.74974	l
14	106ka	355011-34-6	C7H13ClN2O	1-(3-hydroxypropyl)-3-methylimidazolium chloride	3	l
15	107ka	945996-02-1	C7H13ClN2O	1-(ethoxymethyl)-3-methylimidazolium chloride	2.80209	l
16	108ka	1012793-99-5	C8H15BrN2O	1-(2-ethoxyethyl)-3-methylimidazolium bromide	2.51587	l
17	109ka	474972-46-8	C7H13ClN2O	1-(2-methoxyethyl)-3-methylimidazolium chloride	3.26245	l
18	110ka	1012794-06-7	C8H15ClN2O	1-(3-methoxypropyl)-3-methylimidazolium chloride	2.76193	l
19	112ka	937720-90-6	C8H8F6N4O4S2	1-(cyanomethyl)-3-methylimidazolium bis(trifluoromethylsulfonyl)amide	2.07188	l
20	113ka	827027-30-5	C9H13F6N3O5S2	1-(3-hydroxypropyl)-3-methylimidazolium bis(trifluoromethylsulfonyl)amide	1.97909	l
21	114ka	945996-13-4	C9H13F6N3O5S2	1-(ethoxymethyl)-3-methylimidazolium bis(trifluoromethylsulfonyl)amide	1.92634	l
22	115ka	178631-01-1	C9H13F6N3O5S2	1-(2-methoxyethyl)-3-methylimidazolium bis(trifluoromethylsulfonyl)amide	1.97727	l
23	116ka	778593-17-2	C10H15F6N3O5S2	1-(2-ethoxyethyl)-3-methylimidazolium bis(trifluoromethylsulfonyl)amide	1.88309	l
24	117ka	1015254-36-0	C10H15F6N3O5S2	1-(3-methoxypropyl)-3-methylimidazolium bis(trifluoromethylsulfonyl)amide	2.0607	l
25	136ka	710336-91-7	C10H15F6N3	1-butyl-3-methylimidazolium bis(trifluoromethyl)amide	2.8293	l
26	210ka	258273-76-6	C10H20F6N2O4S2	Butylethyldimethylammonium Bis(trifluoromethylsulfonyl)amide	1.39794	l
27	218ka	625835-85-0	C8H20ClN	butylethyldimethylammonium chloride	0.60206	f
28	270ka	852826-83-6	C10H18F6N2O6S2	(ethoxycarbonylmethyl)ethyldimethylammonium bis(trifluoromethylsulfonyl)amide	1.82672	l
29	272ka		C8H18BrNO2	(ethoxycarbonylmethyl)ethyldimethylammonium bromide	2.01284	l
30	276ka	1195983-51-7	C14H18F18NO2P	(ethoxycarbonylmethyl)ethyldimethylammonium trifluoridotris(pentafluoroethyl)phosphate	-3.21824	l
31	306ka	1124-64-7	C9H14ClN	1-butylpyridinium chloride	2.59106	f
32	328ka	900797-79-7	C13H19F6N3O4S2	4-(Dimethylamino)-1-butylpyridinium Bis(trifluoromethylsulfonyl)amide	-0.39794	f
33	329ka	82522-15-4	C11H19ClN2	4-(Dimethylamino)-1-butylpyridinium Chloride	-0.221849	f
34	364ka	460983-97-5	C13H18F6N2O4S2	1-hexylpyridinium bis(trifluoromethylsulfonyl)amide	3.19866	l
35	411ka	223437-11-4	C11H20F6N2O4S2	1-butyl-1-methylpyrrolidinium bis(trifluoromethylsulfonyl)amide	2.53148	f
36	429ka	479500-35-1	C9H20ClN	1-butyl-1-methylpyrrolidinium chloride	3.36922	f
37	440ka	380497-19-8	C13H24F6N2O4S2	1-hexyl-1-methylpyrrolidinium bis(trifluoromethylsulfonyl)amide	1.57171	l
38	452ka	129412-64-2	C9H18BrNO2	1-(ethoxycarbonylmethyl)-1-methylpyrrolidinium bromide	3.15836	l

## Sheet: SM T6
EC50 values for Rat cell line IPC-81 viability test
No.	Symbol (given in this work)	CAS number (if available)	Molecular formlua	Name	Rat cell line IPC-81	ref.
					log10 EC50 [μM]
1	001ka	143314-16-3	C6H11BF4N2	1-Ethyl-3-methylimidazolium Tetrafluoroborate	3.44	e
2	002ka	64697-40-1	C12H23ClN2	3-Methyl-1-octylimidazolium Chloride	2.01284	l
3	003ka	304680-36-2	C12H23F6N2P	3-Methyl-1-octylimidazolium Hexafluorophosphate	1.96	b
4	004ka	244193-52-0	C12H23BF4N2	3-Methyl-1-octylimidazolium Tetrafluoroborate	1.59106	l
5	005ka	171058-20-1	C13H25ClN2	3-Methyl-1-nonylimidazolium Chloride	1.39967	l
6	006ka	343952-29-4	C13H25F6N2P	3-Methyl-1-nonylimidazolium Hexafluorophosphate	1.85491	l
7	007ka	244193-55-3	C13H25BF4N2	3-Methyl-1-nonylimidazolium Tetrafluoroborate	1.65	b
8	008ka	244193-48-4	C7H13BF4N2	3-Methyl-1-propylimidazolium Tetrafluoroborate	3.45484	l
9	009ka	174501-65-6	C8H15BF4N2	1-butyl-3-methylimidazolium tetrafluoroborate	3.23045	a
10	010ka	85100-77-2	C8H15BrN2	1-Butyl-3-methylimidazolium Bromide	3.42651	l
11	011ka	581101-91-9	C9H17BF4N2	1-Butyl-3-ethylimidazolium Tetrafluoroborate	3.25768	l
12	012ka	171058-22-3	C9H17N2Cl	1-methyl-3-pentylimidazolium chloride	3.16	b
13	013ka	280779-52-4	C9H17F6N2P	1-methyl-3-pentylimidazolium hexafluorophosphate	3.07	b
14	014ka	244193-49-5	C9H17BF4N2	1-methyl-3-pentylimidazolium tetrafluoroborate	3.09	b
15	015ka	171058-17-6	C10H19ClN2	1-hexyl-3-methylimidazolium chloride	2.85	e
16	016ka	244193-50-8	C10H19BF4N2	1-Hexyl-3-methylimidazolium Tetrafluoroborate	2.98	l
17	017ka	547719-00-6	C11H21BrN2	1-Hexyl-3-ethylimidazolium Bromide	2.01	b
18	018ka	393550-29-3	C11H21BF4N2	1-Hexyl-3-ethylimidazolium Tetrafluoroborate	2.26	b
19	019ka	581101-92-0	C11H21ClN2	1-heptyl-3-methylimidazolium chloride	2.53	b
20	020ka	357915-04-9	C11H21F6N2P	1-heptyl-3-methylimidazolium hexafluorophosphate	2.3	b
21	021ka	244193-51-9	C11H21BF4N2	1-heptyl-3-methylimidazolium Tetrafluoroborate	2.58	b
22	022ka	171058-18-7	C14H27ClN2	1-decyl-3-methylimidazolium chloride	1.34	e
23	023ka	362043-46-7	C14H27F6N2P	1-decyl-3-methylimidazolium hexafluorophosphate	1.49831	l
24	024ka	244193-56-4	C14H27BF4N2	1-Decyl-3-methylimidazolium Tetrafluoroborate	0.769377	l
25	025ka	581101-93-1	C15H29BrN2	1-Decyl-3-ethylimidazolium Bromide	0.53	e
26	029ka	174899-83-3	C10H15F6N3O4S2	1-butyl-3-methylimidazolium bis(trifluoromethylsulfonyl)imide	2.68215	l
27	031ka			3-(2-hydroxyethyl)-1-methylimidazolium bis(trifluoromethylsulfonyl)imide	3.76343	l
28	035ka	500996-04-3	C11H13BF4N2	1-benzyl-3-methylimidazolium tetrafluoroborate	2.97405	l
29	038ka	342573-75-5	C8H16N2O4S	1-Ethyl-3-methylimidazolium Ethyl Sulfate	3.9284	l
30	039ka	79917-90-1	C8H15ClN2	1-Butyl-3-methylimidazolium Chloride	3.55388	l
31	040ka	304680-35-1	C10H19F6N2P	1-hexyl-3-methylimidazolium Hexafluorophosphate	2.90902	l
32	041ka	174501-64-5	C8H15F6N2P	1-Butyl-3-methylimidazolium Hexafluorophosphate	3.09691	l
33	047ka			1-(2-Methoxypropyl)-3-methylimidazolium Bis(trifluoromethylsulfonyl)amide	3.34	e
34	048ka			1-(2-Methoxypropyl)-3-methylimidazolium Chloride	4.49	e
35	053ka	174899-96-8	C11H17F3N2O2	1-Butyl-3-ethylimidazolium Tetrafluoroborate	3.31387	l
36	054ka	145022-48-6	C10H17F3N2O3S	1-Butyl-3-ethylimidazolium Tetrafluoroborate	3.42651	l
37	055ka			1-Butyl-3-methylimidazolium Bis(trifluoromethyl)amide	2.19	e
38	057ka	174899-66-2	C9H15F3N2O3S	1-Butyl-3-methylimidazolium Trifluoromethanesulfonate	3.02119	l
39	058ka			1-Butyl-3-methylimidazolium Dicyanamide	3.15	e
40	060ka	595565-54-1	C13H26N2O6S	1-Butyl-3-methylimidazolium 2-(2-Methoxyethoxy)ethyl sulfate	3.15836	l
41	061ka	401788-98-5	C9H18N2O4S	1-Butyl-3-methylimidazolium 1-Methylsulfate	3.21219	l
42	062ka	445473-58-5	C16H32N2O4S	1-Butyl-3-methylimidazolium 1-Octylsulfate	3.22531	l
43	063ka	262297-13-2	C8H16N2O4S	1-Butyl-3-methylimidazolium Hydrogensulfate	3.2878	l
44	064ka			1-Butyl-3-methylimidazolium Toluene-4-sulfonate	3.29	e
45	065ka	344790-87-0	C9H15N3S	1-Butyl-3-methylimidazolium Thiocyanate	3.41664	l
46	066ka	342789-81-5	C9H18N2O3S	1-Butyl-3-methylimidazolium 1-Methanesulfonate	3.51188	l
47	067ka	65039-05-6	C8H15IN2	1-Butyl-3-methylimidazolium Iodide	3.48144	l
48	068ka	376650-04-3	C18H19BN2O4	1-Ethyl-3-methylimidazolium Bis[1,2-benzenediolato(2-)-O1,O2]borate	1.02531	l
49	069ka	852616-00-3	C10H11F10N2O2P	1-ethyl-3-methylimidazolium bis(pentafluoroethyl)phosphinate	2.83123	l
50	070ka			1-Ethyl-3-methylimidazolium Bis[oxalato(2-)]-borate	2.93	e
51	071ka	742099-80-5	C10H11BN6	1-Ethyl-3-methylimidazolium Tetracyanoborate	3.5	e
52	072ka	155371-19-0	C6H11F6N2P	1-ethyl-3-methylimidazolium hexafluorophosphate	3.91803	l
53	073ka	174899-65-1	C8H11F3N2O2	1-ethyl-3-methylimidazolium trifluoroacetate	4.00432	l
54	074ka			1-Ethyl-3-methylimidazolium Toluene-4-sulfonate	3.81	e
55	075ka	412009-61-1	C6H12N2O4S	1-ethyl-3-methylimidazolium hydrogen sulfate	3.99	e
56	076ka	145022-44-2	C7H11F3N2O3S	1-ethyl-3-methylimidazolium trifluoromethanesulfonate	4.08636	l
57	078ka	61546-01-8	C20H39ClN2	1-hexadecyl-3-methylimidazolium chloride	-0.240332	l
58	079ka			1-Hexyl-3-methylimidazolium 1,2-Benzisothiazolonium 1,1-dioxide	2.29	e
59	081ka	433337-12-3	C12H15F6N2P	1-Methyl-3-(2-phenylethyl)imidazolium Hexafluorophosphate	2.92788	l
60	082ka			1-Methyl-3-[(4-methylphenyl)methyl]imidazolium Chloride	2.64	e
61	083ka			1-Methyl-3-[(4-methylphenyl)methyl]imidazolium Tetrafluoroborate	2.67	e
62	084ka			3-Hexyl-1,2-dimethylimidazolium Tetrafluoroborate	1.9	e
63	085ka	171058-19-8	C22H43ClN2	3-Methyl-1-octadecylimidazolium Chloride	0.0128372	l
64	086ka			3-Methyl-1-octylimidazolium Bis(trifluoromethylsulfonyl)amide	1.64	e
65	087ka	171058-21-2	C18H35ClN2	3-Methyl-1-tetradecylimidazolium Chloride	-0.42	e
66	097ka	382150-50-7	C12H19F6N3O4S2	1-hexyl-3-methylimidazolium bis(trifluoromethylsulfonyl)amide	2.24304	l
67	098ka	878005-11-9	C12H11F18N2P	1-ethyl-3-methylimidazolium trifluoridotris(pentafluoroethyl)phosphate	2	a
68	099ka	917762-91-5	C14H15F18N2P	1-butyl-3-methylimidazolium trifluoridotris(pentafluoroethyl)phosphate	1.37475	l
69	100ka	713512-19-7	C16H19F18N2P	1-hexyl-3-methylimidazolium trifluoridotris(pentafluoroethyl)phosphate	1.42813	l
70	101ka	943229-71-8	C19H19F24N2P	1-hexyl-3-methylimidazolium trifluoridotris(heptafluoropropyl)phosphate	1.69897	l
71	102ka	852616-00-3	C10H11F10N2O2P	1-ethyl-3-methylimidazolium bis(pentafluoroethyl)phosphinate	2.83251	a
72	103ka	385384-39-4	C12H15CoN2O4	1-butyl-3-methylimidazolium tetracarbonylcobaltate	2.44716	a
73	105ka	1012794-00-1	C6H11INO2	1-(2-hydroxyethyl)-3-methylimidazolium iodide	4.30103	l
74	106ka	355011-34-6	C7H13ClN2O	1-(3-hydroxypropyl)-3-methylimidazolium chloride	4.30103	l
75	107ka	945996-02-1	C7H13ClN2O	1-(ethoxymethyl)-3-methylimidazolium chloride	3.60314	l
76	108ka	1012793-99-5	C8H15BrN2O	1-(2-ethoxyethyl)-3-methylimidazolium bromide	4.13988	l
77	109ka	474972-46-8	C7H13ClN2O	1-(2-methoxyethyl)-3-methylimidazolium chloride	4.30103	l
78	110ka	1012794-06-7	C8H15ClN2O	1-(3-methoxypropyl)-3-methylimidazolium chloride	4.49136	l
79	112ka	937720-90-6	C8H8F6N4O4S2	1-(cyanomethyl)-3-methylimidazolium bis(trifluoromethylsulfonyl)amide	3.90037	l
80	113ka	827027-30-5	C9H13F6N3O5S2	1-(3-hydroxypropyl)-3-methylimidazolium bis(trifluoromethylsulfonyl)amide	3.65992	l
81	114ka	945996-13-4	C9H13F6N3O5S2	1-(ethoxymethyl)-3-methylimidazolium bis(trifluoromethylsulfonyl)amide	3.2014	l
82	115ka	178631-01-1	C9H13F6N3O5S2	1-(2-methoxyethyl)-3-methylimidazolium bis(trifluoromethylsulfonyl)amide	3.25042	l
83	116ka	778593-17-2	C10H15F6N3O5S2	1-(2-ethoxyethyl)-3-methylimidazolium bis(trifluoromethylsulfonyl)amide	3.18184	l
84	117ka	1015254-36-0	C10H15F6N3O5S2	1-(3-methoxypropyl)-3-methylimidazolium bis(trifluoromethylsulfonyl)amide	3.34242	l
85	123ka	79917-89-8	C7H13ClN2	1-methyl-3-propylimidazolium chloride	4.30103	l
86	125ka	805228-35-7	C8H13N2O2.Cl	1-(3-carboxypropyl)-3-methylimidazolium chloride	3.47712	l
87	126ka	952429-64-0	C12H21BrN2O2	1-(7-carboxyheptyl)-3-methylimidazolium bromide	3.47712	l
88	128ka	864665-30-5	C8H15ClN2O	1-(4-hydroxybutyl)-3-methylimidazolium chloride	3.47712	l
89	130ka	637348-59-5	C8H15BrN2	1-ethyl-3-propylimidazolium bromide	3.3	h
90	131ka			1-methylimidazolium tetrafluoroborate	3.09	h
91	132ka	216300-12-8	C7H13F6N2P	1-methyl-3-propylimidazolium hexafluorophosphate	3	l
92	136ka	710336-91-7	C10H15F6N3	1-butyl-3-methylimidazolium bis(trifluoromethyl)amide	2.18752	l
93	138ka	374564-83-7	C6H11BF4N2O	1-(2-hydroxyethyl)-3-methylimidazolium tetrafluoroborate	3.48287	l
94	139ka		C26H47F6N3O4S2	1,3-didecyl-2-methylimidazolium bis(trifluoromethylsulfonyl)amide	-0.128427	l
95	140ka	68039-12-3	C26H52N2O5S	1-ethyl-2-(8-heptadecenyl)-4,5-dihydro-3-(2-hydroxyethyl)-1H-imidazolium O-ethyl sulfate	0.0681859	l
96	142ka	143314-17-4	C8H14N2O2	1-ethyl-3-methylimidazolium acetate	4.22531	l
97	143ka	313475-50-2	C12H10F19N2P	1-methyl-3-(3,3,4,4,5,5,6,6,7,7,8,8,8-tridecafluorooctyl)imidazolium hexafluorophosphate	1.93902	l
98	185ka	187332-85-0	C12H15ClN2	1-methyl-3-(2-phenylethyl)imidazolium chloride	3	l
99	186ka	952429-67-3	C8H13BrN2O	1-methyl-3-(3-oxobutyl)imidazolium bromide	3.47712	l
100	187ka	952429-65-1	C12H23BrN2O	1-(8-hydroxyoctyl)-3-methylimidazolium bromide	2.35793	l
101	188ka	952429-66-2	C12H15F6N2P	1-methyl-3-(4-methylbenzyl)imidazolium hexafluorophosphate	2.6637	l
102	191ka	410522-18-8	C15H22N2O3S	1-butyl-3-methylimidazolium 4-methylbenzenesulfonate	3.29003	l
103	192ka	433337-11-2	C11H13F6N2P	1-benzyl-3-methylimidazolium hexafluorophosphate	3	l
104	193ka	36443-80-8	C11H13ClN2	1-benzyl-3-methylimidazolium chloride	3	l
105	195ka	817575-02-3	C20H40N2O4S	1-methyl-3-octylimidazolium O-octyl sulfate	1.52504	l
106	196ka	790663-77-3	C11H22N2O6S	1-ethyl-3-methylimidazolium O-2-(2-methoxyethoxy)ethyl sulfate	3.84572	l
107	200ka	1196206-01-5	C14H19F9N2O6S3	1-hexyl-3-methylimidazolium tris(trifluoromethylsulfonyl)methanide	2	l
108	201ka	697248-62-7	C17H23N3O3S	1-hexyl-3-methylimidazolium 1,1-dioxo-1,2-dihydrobenzo[d]isothiazol-3-onate	2.3075	l
109	206ka	129073-65-0	C7H18ClNO	(Ethoxymethyl)ethyldimethylammonium Chloride	2.81624	l
110	207ka		C9H18F6N2O5S2	(Ethoxymethyl)ethyldimethylammonium Bis(trifluoromethylsulfonyl)amide	3.8	e
111	208ka			Tetraethylammonium Bis[1,2-benzenediolato(2-)-O1,O2]borate	1.17	e
112	209ka	965-32-2	C19H34ClN	Benzyldecyldimethylammonium Chloride	0.133539	l
113	210ka	258273-76-6	C10H20F6N2O4S2	Butylethyldimethylammonium Bis(trifluoromethylsulfonyl)amide	3.14301	l
114	211ka	258273-75-5	C9H18F6N2O4S2	Butyltrimethylammonium Bis(trifluoromethylsulfonyl)amide	3.61	e
115	212ka	863031-17-8	C10H20F6N2O5S2	Ethyl(2-ethoxyethyl)dimethylammonium Bis(trifluoromethylsulfonyl)amide	2.90849	l
116	213ka	854102-71-9	C8H16F6N2O5S2	Ethyl(2-hydroxyethyl)dimethylammonium Bis(trifluoromethylsulfonyl)amide	3.7	e
117	214ka	557788-37-1	C9H18F6N2O5S2	Ethyl(2-methoxyethyl)dimethylammonium Bis(trifluoromethylsulfonyl)amide	2.9248	l
118	215ka		C10H20F6N2O5S2	Ethyl(3-methoxypropyl)dimethylammonium Bis(trifluoromethylsulfonyl)amide	3.16435	l
119	216ka	1643-19-2	C16H36BrN	tetrabutylammonium bromide	2.25	e
120	217ka		C6H13ClN2	(cyanomethyl)ethyldimethylammonium chloride	3.47276	l
121	218ka	625835-85-0	C8H20ClN	butylethyldimethylammonium chloride	4.30103	g
122	219ka	625835-83-8	C7H18ClNO	ethyl(2-methoxyethyl)dimethylammonium chloride	3.52504	l
123	220ka	625835-84-9	C8H20ClNO	(2-ethoxyethyl)ethyldimethylammonium chloride	3.55991	l
124	221ka		C8H20ClNO	ethyl(3-methoxypropyl)dimethylammonium chloride	3.86153	l
125	222ka	873056-83-8	C8H13F6N3O4S2	(cyanomethyl)ethyldimethylammonium bis(trifluoromethylsulfonyl)amide	3.4609	l
126	223ka	849502-24-5	C9H18F6N2O5S2	ethyl(3-hydroxypropyl)dimethylammonium bis(trifluoromethylsulfonyl)amide	3.44404	l
127	224ka			bis(2-methoxyethyl)ammonium sulfamate	3.48	h
128	225ka	125677-68-1	C7H17NO4	(2-hydroxyethyl)trimethylammonium hydroxyacetate	3.89	h
129	226ka	53226-35-0	C3H9NO3	(2-hydroxyethyl)ammonium formate	3.18184	l
130	227ka			ethyl(2-ethoxyethyl)dimethylammonium chloride	4.3	h
131	228ka		C6H16INO	ethyl(2-hydroxyethyl)dimethylammonium iodide	4.3	h
132	229ka	99150-55-7	C8H19NO4	(2-hydroxyethyl)trimethylammonium 2-hydroxypropanoate	4.3	h
133	233ka	139-08-2…		benzyltetradecyldimethylammonium chloride	-0.272459	l
134	234ka	139-07-1..	C21H38ClN	benzyldodecyldimethylammonium chloride	-0.184422	l
135	235ka	122-18-9	C25H46ClN	benzylhexadecyldimethylammonium chloride	0.33	h
136	239ka	58937-21-6	C6H15NO3	(2-hydroxyethyl)dimethylammonium acetate	2.57171	l
137	240ka	176158-74-0	C6H15NO4	(2-hydroxyethyl)dimethylammonium hydroxyacetate	2.62737	l
138	241ka	56-34-8	C8H20ClN	tetraethylammonium chloride	2.69636	l
139	264ka	916730-48-8	C10H12F18NP	tetramethylammonium trifluoridotris(pentafluoroethyl)phosphate	1.74507	l
140	270ka	852826-83-6	C10H18F6N2O6S2	(ethoxycarbonylmethyl)ethyldimethylammonium bis(trifluoromethylsulfonyl)amide	3.17319	l
141	271ka	461652-34-6	C28H44BNO4	tetrabutylammonium bis[1,2-benzenediolato(2-)]borate	1.28103	l
142	272ka		C8H18BrNO2	(ethoxycarbonylmethyl)ethyldimethylammonium bromide	3.233	l
143	273ka	1217356-13-2	C6H18N2O5S	bis(2-methoxyethyl)ammonium sulfamate	2.91222	l
144	279ka	460092-03-9	C34H68F6NO4PS2	trihexyltetradecylphosphanium bis(trifluoromethylsulfonyl)amide	0.24	h
145	280ka	374683-55-3	C32H68BF4P	trihexyltetradecylphosphanium tetrafluoridoboranuide	0.48	h
146	281ka	916730-43-3	C28H44BO4P	tetrabutylphosphanium bis[1,2-benzenediolato(2-)]borate	1.32	h
147	288ka	3115-68-2	C16H36BrP	tetrabutylphosphanium bromide	1.66	h
148	302ka	874-80-6	C9H14BrN	1-butylpyridinium bromide	3.90417	l
149	305ka	712355-12-9	C12H16N4	1-butyl-3-methylpyridinium dicyanidoamide	3.45788	l
150	307ka	849418-12-8	C11H14F6N2O5S2	1-(2-Ethoxyethyl)pyridinium Bis(trifluoromethylsulfonyl)amide	3.26	e
151	308ka	108153-25-9	C9H14BrNO	1-(2-ethoxyethyl)pyridinium bromide	4.24	e
152	309ka	752260-02-9	C9H10F6N2O5S2	1-(2-hydroxyethyl)pyridinium bis(trifluoromethylsulfonyl)amide	3.79	e
153	310ka	69095-13-2	C7H10INO	1-(2-hydroxyethyl)pyridinium iodide	4.15534	l
154	311ka	863663-01-8	C10H12F6N2O5S2	1-(2-methoxyethyl)pyridinium bis(trifluoromethylsulfonyl)amide	3.18752	l
155	312ka	827027-29-2	C10H12F6N2O5S2	1-(3-hydroxypropyl)pyridinium bis(trifluoromethylsulfonyl)amide	3.55	e
156	313ka	1049752-00-2	C11H14F6N2O5S2	1-(3-methoxypropyl)pyridinium bis(trifluoromethylsulfonyl)amide	3.38	e
157	314ka	1049751-98-5	C10H12F6N2O5S2	1-(ethoxymethyl)pyridinium bis(trifluoromethylsulfonyl)amide	3.12385	l
158	315ka	21379-36-2	C8H12ClNO	1-(ethoxymethyl)pyridinium chloride	3.32	e
159	316ka	286453-46-1	C10H16BF4N	1-Butyl-2-methylpyridinium Tetrafluoroborate	3.25042	l
160	317ka	952429-71-9	C11H18BF4N	1-Butyl-3,4-dimethylpyridinium Tetrafluoroborate	3.02119	l
161	318ka	952429-72-0	C11H18BF4N	1-Butyl-3,5-dimethylpyridinium Tetrafluoroborate	3.25527	l
162	319ka	597581-48-1	C10H16BF4N	1-Butyl-3-methylpyridinium Tetrafluoroborate	3.30103	l
163	320ka	343952-33-0	C10H16BF4N	1-Butyl-4-methylpyridinium Tetrafluoroborate	2.97681	l
164	321ka	203389-28-0	C9H14BF4N	1-butylpyridinium tetrafluoroborate	3.60314	l
165	322ka			1-Cyanomethylpyridinium Bis(trifluoromethylsulfonyl)amide	3.5	e
166	323ka			1-Cyanomethylpyridinium Chloride	3.79	e
167	324ka	952429-73-1	C12H20BF4N	1-Hexyl-4-methylpyridinium Tetrafluoroborate	2.17319	l
168	325ka	936239-96-2	C14H24BF4N	1-Octyl-4-methylpyridinium Tetrafluoroborate	1.48572	l
169	326ka	141645-91-2	C14H24ClN	1-Octyl-4-methylpyridinium Chloride	1.63347	l
170	327ka	4086-73-1	C13H22ClN	1-octylpyridinium chloride	1.26951	l
171	328ka	900797-79-7	C13H19F6N3O4S2	4-(Dimethylamino)-1-butylpyridinium Bis(trifluoromethylsulfonyl)amide	1.82347	l
172	329ka	82522-15-4	C11H19ClN2	4-(Dimethylamino)-1-butylpyridinium Chloride	1.94	e
173	330ka	900797-77-5	C11H15F6N3O4S2	4-(dimethylamino)-1-ethylpyridinium bis(trifluoromethylsulfonyl)amide	2.79099	l
174	331ka	114203-57-5	C9H15BrN2	4-(dimethylamino)-1-ethylpyridinium bromide	2.9	e
175	332ka	1012794-14-7	C13H23ClN2	4-(dimethylamino)-1-hexylpyridinium chloride	0.93	e
176	333ka	872672-57-6	C15H23F6N3O4S2	4-(dimethylamino)-1-hexylpyridinium bis(trifluoromethylsulfonyl)amide	0.93	e
177	336ka	187863-16-7	C8H12ClNO	1-(3-hydroxypropyl)pyridinium chloride	4.30103	g
178	337ka	209679-88-9	C8H12ClNO	1-(2-methoxyethyl)pyridinium chloride	4.30103	g
179	338ka	1012794-07-8	C9H14ClNO	1-(3-methoxypropyl)pyridinium chloride	4.30103	g
180	341ka	401788-99-6	C10H16F6NP	1-butyl-4-methylpyridinium hexafluorophosphate	3	l
181	342ka	941580-56-9	C9H12F3NO6S2	1-(3-sulfopropyl)pyridinium trifluoromethanesulfonate	3.9	h
182	345ka	916730-30-8	C11H18ClN	1-butyl-3,4-dimethylpyridinium chloride	3.04922	l
183	346ka	916730-31-9	C11H18ClN	1-butyl-3,5-dimethylpyridinium chloride	3.42325	l
184	347ka	916730-40-0	C12H20ClN	1-hexyl-3-methylpyridinium chloride	2.39794	l
185	348ka	125652-55-3	C10H16ClN	1-butyl-3-methylpyridinium chloride	3.85612	l
186	351ka	384347-06-2	C15H22F6N2O4S2	1-octylpyridinium bis(trifluoromethylsulfonyl)amide	0	l
187	352ka	62409-49-8	C12H20ClN	1-hexyl-4-methylpyridinium chloride	2.67486	l
188	353ka	112400-86-9	C10H16ClN	1-butyl-4-methylpyridinium chloride	3.31597	l
189	354ka	742099-83-8	C14H16BN5	1-butyl-4-methylpyridinium tetracyanidoboranuide	2.87564	l
190	355ka	53385-72-1	C10H16BrN	1-pentylpyridinium bromide	3.14613	l
191	356ka	890532-45-3	C12H16F6N2O4S2	1-pentylpyridinium bis(trifluoromethylsulfonyl)amide	2.85248	l
192	357ka	883860-38-6	C16H16F18NP	1-butyl-4-methylpyridinium trifluoridotris(pentafluoroethyl)phosphate	0	l
193	358ka	885456-20-2	C10H17NO4S	1-butylpyridinium O-methyl sulfate	3.9154	l
194	359ka	186088-50-6	C9H14F6NP	1-butylpyridinium hexafluorophosphate	3.85126	l
195	360ka	390423-43-5	C10H14F3NO3S	1-butylpyridinium trifluoromethanesulfonate	3.66181	l
196	361ka	6220-15-1	C11H18ClN	1-hexylpyridinium chloride	2.79727	l
197	362ka	797789-00-5	C11H18F6NP	1-hexylpyridinium hexafluorophosphate	2.51455	l
198	363ka	623167-81-7	C12H18F3NO3S	1-hexylpyridinium trifluoromethanesulfonate	2.54407	l
199	364ka	460983-97-5	C13H18F6N2O4S2	1-hexylpyridinium bis(trifluoromethylsulfonyl)amide	2.86747	l
200	365ka	2294-38-4	C7H10ClN	1-ethylpyridinium chloride	4.22011	l
201	367ka	1104525-90-7	C10H12F6N2O4S2	1-propylpyridinium bis(trifluoromethylsulfonyl)amide	3.20412	l
202	373ka	454234-70-9	C9H14ClNO2	3-hydroxy-1-(propoxymethyl)pyridinium chloride	2.9	i
203	374ka	454234-74-3	C13H22ClNO2	1-[(heptyloxy)methyl]-3-hydroxypyridinium chloride	3	i
204	375ka	454234-78-7	C17H30ClNO2	3-hydroxy-1-[(undecyloxy)methyl]pyridinium chloride	1.6	i
205	376ka	1127350-73-5	C13H18N2O6S	3-hydroxy-1-(propoxymethyl)pyridinium acesulfamates	3.5	i
206	377ka	1127350-74-6	C14H20N2O6S	1-butoxymethyl-3-hydroxypyridinium acesulfamates	3.7	i
207	378ka	1127350-76-8	C16H24N2O6S	1-hexyloxymethyl-3-hydroxypyridinium acesulfamates	3.4	i
208	379ka	1127350-77-9	C17H26N2O6S	1-[(heptyloxy)methyl]-3-hydroxypyridinium 6-methyl-2,2-dioxo-1,2,3-oxathiazin-4-onate	3	i
209	380ka	1127350-78-0	C21H34N2O6S	3-hydroxy-1-undecyloxymethylpyridinium acesultamates	1.6	i
210	382ka	1127350-80-4	C17H20N2O5S	1-butoxymethyl-3-hydroxypyridinium saccharinates	3.6	i
211	383ka	1127350-79-1	C16H18N2O5S	3-hydroxy-1-(propoxymethyl)pyridinium 1,1-dioxo-1,2-dihydrobenzo[d]isothiazol-3-onate	3.6	i
212	384ka	1127350-82-6	C19H24N2O5S	1-[(hexyloxy)methyl]-3-hydroxypyridinium 1,1-dioxo-1,2-dihydrobenzo[d]isothiazol-3-onate	3.3	i
213	385ka	1127350-83-7	C20H26N2O5S	1-[(heptyloxy)methyl]-3-hydroxypyridinium 1,1-dioxo-1,2-dihydrobenzo[d]isothiazol-3-onate	3	i
214	386ka	1127350-84-8	C24H34N2O5S	3-hydroxy-1-[(undecyloxy)methyl]pyridinium 1,1-dioxo-1,2-dihydrobenzo[d]isothiazol-3-onate	1.6	i
215	409ka	864461-36-9	C14H24ClN	3-methyl-1-octylpyridinium chloride	1.47129	l
216	410ka	7538-79-6	C8H13IN2	4-(dimethylamino)-1-methylpyridinium iodide	2.88762	l
217	411ka	223437-11-4	C11H20F6N2O4S2	1-butyl-1-methylpyrrolidinium bis(trifluoromethylsulfonyl)amide	3.01	e
218	412ka	663628-46-4	C11H20F6N2O5S2	1-(2-ethoxyethyl)-1-methylpyrrolidinium bis(trifluoromethylsulfonyl)amide	3.2	e
219	413ka	757212-04-7	C9H16F6N2O5S2	1-(2-hydroxyethyl)-1-methylpyrrolidinium bis(trifluoromethylsulfonyl)amide	3.72	e
220	414ka	757240-24-7	C10H18F6N2O5S2	1-(2-methoxyethyl)-1-methylpyrrolidinium bis(trifluoromethylsulfonyl)amide	3.3	e
221	415ka	1017553-47-7	C9H13F6N3O4S2	1-(cyanomethyl)-1-methylpyrrolidinium bis(trifluoromethylsulfonyl)amide	3.8	e
222	417ka		C10H18F6N2O5S2	1-(3-hydroxypropyl)-1-methylpyrrolidinium bis(trifluoromethylsulfonyl)amide	3.6	e
223	418ka		C11H20F6N2O5S2	1-(3-methoxypropyl)-1-methylpyrrolidinium bis(trifluoromethylsulfonyl)amide	3.4	e
224	419ka	151263-00-2	C8H18ClNO	1-(ethoxymethyl)-1-methylpyrrolidinium chloride	3.05	e
225	420ka		C10H18F6N2O5S2	1-(ethoxymethyl)-1-methylpyrrolidinium bis(trifluoromethylsulfonyl)amide	3.26	e
226	421ka	952429-75-3	C16H34BF4N	1,1-Dihexylpyrrolidinium Tetrafluoroborate	1.23	e
227	422ka	345984-11-4	C9H20BF4N	1-Butyl-1-methylpyrrolidinium Tetrafluoroborate	2.9	e
228	423ka	93457-69-3	C9H20BrN	1-butyl-1-methylpyrrolidinium bromide	3.77	e
229	424ka			1-Butyl-1-methylpyrrolidinium Dicyanamide	4.23	e
230	425ka	909398-59-0	C11H24ClN	1-hexyl-1-methylpyrrolidinium chloride	2.91	e
231	426ka	952429-74-2	C13H28BF4N	1-Methyl-1-octylpyrrolidinium Tetrafluoroborate	1.82	e
232	427ka	909398-60-3	C13H28ClN	1-methyl-1-octylpyrrolidinium chloride	2.59	e
233	428ka	54770-67-1	C7H16INO	1-(2-hydroxyethyl)-1-methylpyrrolidinium iodide	4.30103	g
234	429ka	479500-35-1	C9H20ClN	1-butyl-1-methylpyrrolidinium chloride	4.30103	g
235	430ka	941584-15-2	C8H18ClNO	1-(3-hydroxypropyl)-1-methylpyrrolidinium chloride	4.30103	g
236	431ka	1012794-01-2	C8H18ClNO	1-(2-methoxyethyl)-1-methylpyrrolidinium chloride	4.30103	g
237	432ka	833446-39-2	C9H20BrNO	1-(2-ethoxyethyl)-1-methylpyrrolidinium bromide	4.30103	g
238	433ka	1012794-05-6	C9H20ClNO	1-(3-methoxypropyl)-1-methylpyrrolidinium chloride	4.30103	g
239	434ka	851856-47-8	C15H20F18NP	1-butyl-1-methylpyrrolidinium trifluoridotris(pentafluoroethyl)phosphate	2.41	h
240	439ka	194986-69-1	C7H13ClN2	1-(cyanomethyl)-1-methylpyrrolidinium chloride	4.23	h
241	451ka	1107545-20-9	C11H18F6N2O6S2	1-(ethoxycarbonylmethyl)-1-methylpyrrolidinium bis(trifluoromethylsulfonyl)amide	3.59218	l
242	452ka	129412-64-2	C9H18BrNO2	1-(ethoxycarbonylmethyl)-1-methylpyrrolidinium bromide	3.84448	l

## Sheet: SM T7
EC50 values for Human cell line HeLa viability test
No.	Symbol (given in this work)	CAS number (if available)	Molecular formlua	Name	Human cell line HeLa	ref.
					log10 EC50 [μM]
1	001ka	143314-16-3	C6H11BF4N2	1-Ethyl-3-methylimidazolium Tetrafluoroborate	0.997386	d
2	004ka	244193-52-0	C12H23BF4N2	3-Methyl-1-octylimidazolium Tetrafluoroborate	-0.522879	d
3	009ka	174501-65-6	C8H15BF4N2	1-butyl-3-methylimidazolium tetrafluoroborate	0.658011	d
4	010ka	85100-77-2	C8H15BrN2	1-Butyl-3-methylimidazolium Bromide	0.439333	d
5	029ka	174899-83-3	C10H15F6N3O4S2	1-butyl-3-methylimidazolium bis(trifluoromethylsulfonyl)imide	0.0681859	d
6	035ka	500996-04-3	C11H13BF4N2	1-benzyl-3-methylimidazolium tetrafluoroborate	0.25042	d
7	036ka	61545-99-1	C12H23BrN2	1-methyl-3-octylimidazolium bromide	-0.522879	d
8	037ka		C11H13BrN2	1-benzyl-3-methylimidazolium bromide	-0.275724	d
9	088ka	174899-82-2	C8H11F6N3O4S2	1-ethyl-3-methylimidazolium bis(trifluoromethylsulfonyl)amide	0.260071	d
10	089ka	178631-04-4	C14H23F6N3O4S2	1-methyl-3-octylimidazolium bis(trifluoromethylsulfonyl)amide	-0.721246	d
11	090ka	65039-10-3	C7H11ClN2	1-methyl-3-(2-propenyl)imidazolium chloride	0.847573	d
12	091ka			1-methyl-3-(2-propenyl)imidazolium tetraflouruborate	0.89487	d
13	092ka			1-methyl-3-(2-propenyl)imidazolium bis(trifluoromethylsulfonyl)amide	0.212188	d
14	093ka			1-benzyl-3-methylimidazolium bis(trifluoromethylsulfonyl)amide	-0.481486	d
15	202ka	71-91-0	C8H20BrN	tetraethylammonium bromide	1.25864	d
16	203ka	13028-69-8	C10H24BrN	Butyl(triethyl)azanium bromide	0.90309	d
17	204ka		C14H32BrN	triethyl(octyl)azanium bromide	-0.481486	d
18	205ka	5197-95-5	C13H22BrN	benzyl(triethyl)azanium bromide	0.723456	d
19	302ka	874-80-6	C9H14BrN	1-butylpyridinium bromide	0.503791	d
20	303ka		C13H22BrN	1-octylpyridinium bromide	-0.552842	d
21	334ka			1-ethylpyridinium bis(trifluoromethylsulfonyl)amide(1-)	0.409933	d

## Sheet: SM T8
IC50 values for Human cell line MCF7 viability test
No.	Symbol (given in this work)	CAS number (if available)	Molecular formlua	Name	Human cell line MCF7	ref.
					log10 IC50 [μM]
1	133ka			1-methyl-1-propylimidazolium bis(trifluoromethylsulfonyl)imide	0.799134	q
2	134ka			1-meth-1-hexylimidazolium bis(trifluoromethylsulfonyl)imide	-0.191789	q
3	135ka			1-methyl-1-octylimidazolium tetrafluoroborate	-0.160522	q
4	303ka		C13H22BrN	1-octylpyridinium bromide	-2.04576	q
5	304ka	872672-72-5	C14H24BrN	3-methyl-1-octylpyridinium bromide	-2	q
6	368ka			1-octyl-4-methylpyridinium bis(trifluoromethylsulfonyl)imide	-1.48149	q
7	371ka			1-octyl-2-methylpyridinium bromide	-2.09691	q
8	372ka			1-octyl-4-methylpyridinium bromide	-1.61979	q
9	411ka	223437-11-4	C11H20F6N2O4S2	1-butyl-1-methylpyrrolidinium bis(trifluoromethylsulfonyl)amide	0.143639	q
10	423ka	93457-69-3	C9H20BrN	1-butyl-1-methylpyrrolidinium bromide	1.25042	q
11	444ka			1-methyl-1-propylpyrrolidinium bis(fluoromethylsulfonyl)imide	0.665581	q
12	447ka			1-methyl-1-octylpyrrolidinium bis(trifluoromethylsulfonyl)imide	-1.07058	q
13	448ka			1-methyl-1-[4,5- bis(methylsulfide)pentyl]pyrrolidinium bis(trifluoromethylsulfonyl)imide	0.49693	q

## Sheet: SM T9
EC50 values for Daphnia Magna immobilization test
No.	Symbol (given in this work)	CAS number (if available)	Molecular formlua	Name	Daphnia Magna	ref.
					log10 EC50 [mg/l]
1	026ka	35487-17-3	C4H6ClN2	1-methylimidazolium chloride	2	c
2	028ka		C6H10Cl2N2	1-methyl 3-(2-chloroethyl) imidazolium chloride	2	c
3	029ka	174899-83-3	C10H15F6N3O4S2	1-butyl-3-methylimidazolium bis(trifluoromethylsulfonyl)imide	1.27669	c
4	030ka			3-(2-chloroethyl)-1-methylimidazolium bis(trifluoromethylsulfonyl)imide	2	c
5	031ka			3-(2-hydroxyethyl)-1-methylimidazolium bis(trifluoromethylsulfonyl)imide	2	c
6	032ka			3-(2-chloropropyl)-1-methylimidazolium chloride	1.77721	c
7	033ka			1-methyl-3-[(trimethylsilyl)methyl]-imidazolium bromide	1.24378	c
8	034ka			1-(2-Chloroethyl)imidazolium chloride	2	c
9	039ka	79917-90-1	C8H15ClN2	1-Butyl-3-methylimidazolium Chloride	0.812913	j
10	041ka	174501-64-5	C8H15F6N2P	1-Butyl-3-methylimidazolium Hexafluorophosphate	1.38021	j
11	078ka	61546-01-8	C20H39ClN2	1-hexadecyl-3-methylimidazolium chloride	-2.46852	j
12	085ka	171058-19-8	C22H43ClN2	3-Methyl-1-octadecylimidazolium Chloride	-2.76955	j
13	306ka	1124-64-7	C9H14ClN	1-butylpyridinium chloride	1.30103	j
14	411ka	223437-11-4	C11H20F6N2O4S2	1-butyl-1-methylpyrrolidinium bis(trifluoromethylsulfonyl)amide	1.56996	c
15	454ka			triethylsulfonium bromide	2	c

[truncated: 1 more sheets: references]
